1 **Title: Significant functional differences despite morphological and molecular similarity**  
2 **in fully differentiated matched Conditionally Reprogrammed (CRC) and Feeder free**  
3 **dual SMAD inhibited expanded human nasal epithelial cells**

4  
5 **Running title:** Morphological, molecular and functional characterisation of human nasal  
6 epithelial cells

7  
8 Nikhil T. Awatade<sup>1,2</sup>, Sharon L. Wong<sup>1,2</sup>, Elvis Pandzic<sup>4</sup>, Iveta Slapetova<sup>4</sup>, Alexander  
9 Capraro<sup>1,2</sup>, Ling Zhong<sup>5</sup>, Nihan Turgutoglu<sup>1,2</sup>, Laura K. Fawcett<sup>1,2,3</sup>, Renee M. Whan<sup>4</sup>, Adam  
10 Jaffe<sup>1,2,3</sup> and Shafagh A. Waters\*<sup>1,2,3</sup>

11  
12  
13 **Author affiliation**

14 <sup>1</sup>*School of Women's and Children's Health, Faculty of Medicine, University of New South*  
15 *Wales, Sydney, NSW, Australia.*

16 <sup>2</sup>*Molecular and Integrative Cystic Fibrosis Research Centre (miCF\_RC), University of New*  
17 *South Wales and Sydney Children's Hospital, Sydney, NSW, Australia.*

18 <sup>3</sup>*Department of Respiratory Medicine, Sydney Children's Hospital, Sydney, NSW, Australia*

19 <sup>4</sup>*Biomedical Imaging Facility, University of New South Wales, Sydney, NSW, Australia.*

20 <sup>5</sup>*Bioanalytical Mass Spectrometry Facility, University of New South Wales, Sydney, NSW,*  
21 *Australia.*

22  
23 **\*Correspondence**

24 Dr. Shafagh Waters

25 [Shafagh.waters@unsw.edu.au](mailto:Shafagh.waters@unsw.edu.au)

45 **Abstract**

46 **Background**

47 Patient-derived airway cells differentiated at Air Liquid Interface (ALI) are valuable models  
48 for Cystic fibrosis (CF) precision therapy. Advances in culture techniques have improved  
49 expansion capacity of airway basal cells, while retaining functional airway epithelium  
50 physiology. However, considerable variation in response to CFTR modulators is observed  
51 even when using similar ALI culture techniques. We aimed to address if variation in response  
52 reflects true biological differences between patients or technical differences as a consequence  
53 of different culture expansion methods.

54

55 **Methods**

56 Nasal epithelial brushings from 14 individuals (CF=9; non-CF=5) were collected, then  
57 equally divided and expanded under conditional reprogramming culture (CRC) and feeder-  
58 serum-free “dual-SMAD inhibition” (SMADi) methods. Expanded cells from each culture  
59 were differentiated with proprietary PneumaCult™-ALI media. Morphology  
60 (Immunofluorescence), global proteomics (LC-MS/MS) and function (barrier integrity, cilia  
61 motility, and ion transport) were compared in CRC<sup>ALI</sup> and SMADi<sup>ALI</sup> under basal and CFTR  
62 corrector treated (VX-809) conditions.

63

64 **Results**

65 No significant difference in the structural morphology or global proteomics profile were  
66 observed. Barrier integrity and cilia motility were significantly different, despite no  
67 difference in cell junction morphology or cilia abundance. Epithelial Sodium Channels and  
68 Calcium-activated Chloride Channel activity did not differ but CFTR mediated chloride  
69 currents were significantly reduced in SMADi<sup>ALI</sup> compare to their CRC<sup>ALI</sup> counterparts.

70

71 **Conclusion**

72 Alteration of cellular physiological function *in vitro* occurs were more prominent than  
73 structural and differentiation potential in airway ALI. Since culture conditions significantly  
74 influence CFTR activity, this could lead to false conclusions if data from different labs are  
75 compared against each other without specific reference ranges.

76

77 **Keywords:**

78 *In Vitro* cell models, CFTR, Air liquid interface, Conditional reprogramming, dual SMAD  
79 inhibition, cystic fibrosis, companion diagnostic

80

81 **Abbreviations:**

82 CF (Cystic Fibrosis), CFTR (Cystic Fibrosis Transmembrane Conductance Regulator), ALI  
83 (air liquid interface), ATP (Adenosine tri phosphate), HBE (human bronchial epithelial cell),  
84 HNE (human nasal epithelial cell), CRC (conditionally reprogrammed cultures), ROCK  
85 (Rho-associated protein kinase), P (passage), TEER (Trans-epithelial electrical resistance),  
86 TGF-β (Transforming growth factor-beta), I<sub>sc</sub> (Short circuit current), CaCC (Calcium  
87 activated chloride channels), CBF (Ciliary beating frequency)

## 88 1. INTRODUCTION

89 Following years of end-organ symptom treatment, novel targeted CFTR therapies (known as  
90 CFTR modulators) that can restore CFTR protein function have been developed. The large  
91 number (>2000) of variants in the CFTR gene results in a variety of clinical phenotypes and  
92 multiple different CFTR structural defects (1). CFTR modulators such as correctors that  
93 stabilize and increase CFTR protein trafficking (e.g. VX-809/Lumacaftor) and potentiators,  
94 which increase channel opening probability (e.g. VX-770/Ivacaftor) have gained regulatory  
95 approval to treat people with CF, with common and well-characterised CFTR mutations (2).  
96 Yet, inter-subject variability among individuals with the same CFTR genotype has been  
97 described. Patients with F508del, the most common CFTR mutation amongst the CF  
98 population worldwide, display a spectrum of responses to CFTR-modulator drugs despite  
99 having the same CFTR mutation variant (2, 3).

100

101 One of the key goals of the CF field has been the advancement of personalised therapies.  
102 Differentiated primary human bronchial epithelial cells (HBECs) have been instrumental for  
103 understanding CFTR structure and for testing rare CFTR variant- and patient-specific  
104 responsiveness to modulator drugs (4-7). HBECs grown at an air-liquid interface (ALI) is the  
105 gold standard pre-clinical model system for CF translational studies (8). Since HBECs can  
106 only be isolated through invasive procedures, sampling a large number of patients is  
107 challenging. Human nasal epithelial cells (HNECs) are increasingly shown to be an  
108 appropriate, non-invasive surrogate for HBECs since they share profound similarities in  
109 CFTR expression profile, growth characteristics and mucociliary differentiation pattern (9-  
110 12).

111

112 Different *in vitro* culture methods have been developed to overcome the limitation of primary  
113 cell proliferative capacity. Amongst these, the conditional reprogramming culture (CRC)  
114 technique is currently most widely used (13-15). CRC supports the long-term expansion of  
115 airway epithelial cells with the use of irradiated feeder cells and RhoA kinase inhibitor. More  
116 recently, a feeder and serum-free approach has been described for long-term clonal growth of  
117 HBEC. This approach uses small molecule inhibitors of the SMAD-dependent TGF- $\beta$   
118 (Transforming Growth Factor Beta) and Bone Morphogenic Protein (BMP) signalling  
119 pathways, referred to as “dual-SMAD inhibition” (SMADi) (16, 17). SMADi cultures confer  
120 the advantage of having no contaminating feeder cells. Both methods have been shown to  
121 enhance cell growth and lifespan while preserving electrophysiological and morphological  
122 properties (11, 16, 18-21).

123

124 A lack of well-defined standardised culture conditions for patient derived airway cells has led  
125 to considerable variation in cell differentiation observed between research groups when using  
126 similar ALI culture techniques. In studies where cells are sourced from various commercial  
127 vendors or academic biobanks, it is thus difficult to decipher if this reflects true biological  
128 differences between subjects or technical differences due to the manner or circumstances in  
129 which the cells were obtained and expanded. The objective of this study was to ascertain if  
130 using different methodology (CRC vs. SMADi) to expand primary nasal epithelial cells

131 resulted in differences in molecular, structural and functional profile of those cells when  
132 differentiation at Air Liquid Interface (ALI) (**Fig 1A**).

133

134 In this study, we collected nasal epithelial brushings from 14 individuals (nine with CF and  
135 five non-CF controls). The brushed cells were divided and expanded with two distinct culture  
136 techniques. The CRC- and SMADi - expanded basal epithelial cells from each donor were  
137 then differentiated into mature pseudostratified epithelial cells at air-liquid interface with  
138 proprietary Pneumacult-ALI media. We found that despite no significant difference in the  
139 differentiated epithelium's structural morphology or global proteomics profile between the  
140 two culture systems, their functional behaviour (assessed by epithelial barrier integrity, cilia  
141 beat frequency and ion channel activity) was significantly different.

142

## 143 **2. MATERIALS and METHODS**

144 Detailed materials and methods are available as supplementary materials (**Supplementary 1**).

145

## 146 **3. RESULTS**

147 Paired CRC- and SMADi-expanded HNE cells were created from 14 donors. Of these nine  
148 have homozygous F508del-CFTR, and five donors have wild-type CFTR genotype. SMADi  
149 cultures exhibited a neatly packed cobblestone morphology, characteristic of epithelial cells.  
150 CRC cultures demonstrated cells of similar size but the cells appeared to have a more oval  
151 shape (**Fig 1B**). Both CRC and SMADi cultures demonstrated donor-to-donor variability in  
152 two growth characteristics. On average, cultures reached ~80% confluency in ~7 to 20 days.  
153 The population doubling rate of CRC cultures were largely similar to those of the SMADi  
154 cultures, in both CF and non-CF cultures, averaging between 4.35 and 15.04 (**Fig 1C**). Both  
155 cultures demonstrated donor-to-donor variability in rate of growth, with a few notable  
156 slower-growing cultures in both methods.

157

### 158 **3.1 Morphology of CRC and SMADi expanded cultures differentiated at air liquid 159 interface is similar**

160 Cells from each expansion method were cultured on porous membrane transwells with  
161 identical differentiation methodology. These cultures, hereafter referred to as CRC<sup>ALI</sup> and  
162 SMADi<sup>ALI</sup>, both showed formation of a polarised, pseudostratified epithelial layer with  
163 mucociliary differentiation. No difference in differentiation potential was observed between  
164 donor paired CRC<sup>ALI</sup> and SMADi<sup>ALI</sup> cultures. Cells were uniform, organized, and had typical  
165 epithelial cobblestone morphology, with little variability observed in all ALI cultures (**Fig 2-**  
166 **Donor 1**; and **Fig S1-** Donor 4).

167

168 To test the epithelial architecture, we performed an immunofluorescence characterisation of  
169 two CF donor-matched CRC<sup>ALI</sup> and SMADi<sup>ALI</sup> cultures (**Fig 2** and **Fig S1**). In CF CRC<sup>ALI</sup>  
170 and SMADi<sup>ALI</sup> cultures, stem cell p63 marker lined the basal cell compartment of the  
171 stratified epithelium (red; **Fig 2A**). Distribution of adherens junction, E-cadherin (green; **Fig  
172 2A and Fig S1**) proteins and tight junction proteins, ZO-1 (red; **Fig 2B, Fig S1**) did not differ  
173 and was limited to the apical cells. These proteins are characteristic features of mature  
174 differentiated airway epithelia and demonstrate an intact epithelial barrier. Furthermore, we

175 compared the trans-epithelial electrical resistance ( $R_{TE}$ ) of cultures as a quantitative technique  
176 to measure the integrity of tight junction dynamics in both ALI models. Both CRC<sup>ALI</sup> and  
177 SMADi<sup>ALI</sup> cultures exhibited donor-to-donor variability in resistance values, which ranged  
178 between 200 to 1000  $\Omega \cdot \text{cm}^2$  (Fig 2C, Fig S3A). Irrespective of the CFTR genotype, a trend of  
179 higher resistance was observed in SMADi<sup>ALI</sup> when compared to CRC<sup>ALI</sup> cultures. In CF ALI  
180 cultures, this trend reached statistical significance ( $R_{TE}$ :  $538.7 \pm 27.55$  vs.  $474.2 \pm 27.55$   
181  $\Omega \cdot \text{cm}^2$  respectively,  $P \leq 0.01$ ).

182

### 183 **3.2 Global proteomic signature of CRC and SMADi expanded cultures differentiated at** 184 **air liquid interface are similar**

185 Assessing molecular differences between the CRC<sup>ALI</sup> and SMADi<sup>ALI</sup> cultures was achieved  
186 by performing global label-free proteomics analyses. CF and non-CF untreated cultures and  
187 CF cultures treated with VX-809 were assessed (Fig 3). Between CF and non-CF, 2305 and  
188 2314 proteins were identified in CRC<sup>ALI</sup> and SMADi<sup>ALI</sup> cultures, respectively. There were no  
189 global differences in any proteins (Fig 3) including those specifically involved in SMADi or  
190 TGF- $\beta$  regulation (Table S4) between CF and non-CF under either CRC<sup>ALI</sup> or SMADi<sup>ALI</sup>  
191 methods. In CF, between untreated CRC<sup>ALI</sup> and SMADi<sup>ALI</sup> cultures, 2505 proteins were  
192 identified, while between VX-809-treated CRC<sup>ALI</sup> and SMADi<sup>ALI</sup> cultures, 2514 proteins  
193 were identified. No differentially abundant proteins ( $q$ -value  $< 0.05$ , fold-change  $> 2$ ) could  
194 be determined (Fig 3 and Table S4).

195

### 196 **3.3 Cilia abundance is the same but cilia beating frequency is higher in CRC<sup>ALI</sup> than** 197 **SMAD<sup>ALI</sup>**

198 Both ALI models exhibit functional micro-physiological processes, including beating cilia  
199 and the ability to secrete mucus. Positive immunoreactivity of acetylated tubulin (ciliated cell  
200 marker) (green; Fig 4A, Fig S1A) and MUC5AC (secretory goblet cell marker) were detected  
201 at the apical cell surface for both cultures. No skewing towards a specific secretory or more  
202 ciliated phenotype was apparent. We confirmed motility of cilia by cilia beat frequency  
203 (CBF) measurements. We observed inter-donor heterogeneity in CBF measurements, ranging  
204 between 3.72 to 10.05 Hz (Fig 4B). CBF values of CF-CRC<sup>ALI</sup> were significantly higher  
205 compared to CF SMADi<sup>ALI</sup> ( $7.58 \pm 0.24$  vs.  $6.29 \pm 0.32$  Hz;  $P \leq 0.05$ ) under basal conditions  
206 and when cultures were treated with VX-809 ( $7.64 \pm 0.31$  vs.  $6.22 \pm 0.18$  Hz;  $P \leq 0.001$ ). A  
207 similar trend was observed when comparing CRC cultures from the five non-CF donors to  
208 their matched SMADi ALI cultures, although statistical significance was not achieved in this  
209 group ( $6.84 \pm 0.17$  vs.  $6.63 \pm 0.30$  to Hz).

210

### 211 **3.4 Ion transport functional assessment in matched CRC- and SMADi -ALI cultures**

212 Electrophysiological profiles of CRC<sup>ALI</sup> and SMADi<sup>ALI</sup> epithelial cells were created by  
213 assessing the function of Amiloride sensitive Epithelial Sodium Channels (ENaC), calcium-  
214 activated chloride channel (CaCC) and CFTR mediated Chloride channel (CFTR) from both  
215 CF and non-CF donors (Fig 5, Fig S2, Table S5). As expected, donor - to - donor variability  
216 was evident for all ion channel functions (Fig S3).

217

### 218 **3.4.1 Amiloride-inhibited ENaC currents are similar in CF CRC vs. SMADi HNE ALI** 219 **cultures**

220 No difference in basal ENaC activity was observed between CRC<sup>ALI</sup> and SMADi<sup>ALI</sup> cultures  
221 in all donors (**Fig 5A, Fig S3B**). ENaC inhibited currents remained largely similar when  
222 treated with VX-809, reinforcing that VX-809 treatment does not modify ENaC inhibited  
223 currents.

### 225 **3.4.2 ATP-stimulated calcium-activated Cl<sup>-</sup> (CaCC) currents in CRC vs. SMADi HNE** 226 **ALI cultures**

227 The addition of adenosine triphosphate (ATP) generated transient calcium-activated chloride  
228 channel (CaCC) currents ( $\Delta I_{sc-ATP}$ ). Both CRC and SMADi cultures displayed variability in  
229  $\Delta I_{sc-ATP}$  values while the mean average across all cultures were largely comparable, between  
230 3.00 to 5.72  $\mu A/cm^2$  (**Fig 5B, Fig S3C**). VX-809-treated CF SMADi<sup>ALI</sup> cultures exhibited  
231 significantly lower ATP-activated currents compared to the paired CRC<sup>ALI</sup> cultures (**Fig 5B**).  
232 The difference was significant, but modest ( $P \leq 0.05$ ). No disparity was observed in the  
233 corresponding non-treated CF CRC<sup>ALI</sup> vs. SMADi<sup>ALI</sup> cultures, as well as both cultures in  
234 non-CF cultures.

### 236 **3.4.3 Baseline CFTR-mediated Cl<sup>-</sup> currents in CRC is higher than SMADi HNE ALI** 237 **cultures**

238 Apical CFTR localisation was confirmed in matched CRC<sup>ALI</sup> and SMADi<sup>ALI</sup> cultures derived  
239 from a non-CF donor (**Fig S4-Donor 11**). To assess baseline CFTR mediated Cl<sup>-</sup> secretion,  
240 cAMP agonist forskolin was used to activate CFTR Cl<sup>-</sup> channel, followed by potentiation  
241 with genistein. In CF CRC<sup>ALI</sup> and SMADi<sup>ALI</sup> cultures, forskolin-induced currents ( $\Delta I_{sc-Fsk}$ )  
242 were negligible (**Fig 5C, Fig S3D**). This observation is consistent with previous F508del-  
243 CFTR reports of minimal residual function (11, 21). Potentiation of CF ALI cultures with  
244 genistein increased forskolin-stimulated currents by nearly 2-fold, up to  $2.86 \pm 0.20$  and  $2.40$   
245  $\pm 0.29 \mu A/cm^2$ , respectively (**Fig 5C**).

247 As anticipated, irrespective of the expansion method, CF ALI cultures had significantly lower  
248 CFTR basal activity to the non-CF cultures (**Figure 5C, Fig S2**). In non-CF cultures,  
249 forskolin-induced CFTR-mediated currents ( $\Delta I_{sc-Fsk}$ ) were significantly higher in the CRC<sup>ALI</sup>  
250 ( $25.50 \pm 1.77 \mu A/cm^2$ ) compared to their matched SMADi<sup>ALI</sup> cultures ( $17.53 \pm 1.69 \mu A/cm^2$ )  
251 ( $P \leq 0.01$ ; **Fig 5C**).

### 253 **3.4.4 VX-809-rescued CFTR-mediated Cl<sup>-</sup> currents in SMADi CF HNE ALI cultures is** 254 **significantly lower compared to CRC**

255 Treatment of CF CRC<sup>ALI</sup> and SMADi<sup>ALI</sup> cultures with VX-809 led to significant correction of  
256 CFTR function from all CF donors (**Fig 5C, Fig S2A**). Forskolin-induced currents ( $\Delta I_{sc-Fsk}$ )  
257 in CRC<sup>ALI</sup> increased by 5-fold (from  $1.48 \pm 0.12$  to  $7.43 \pm 0.63 \mu A/cm^2$ ) with VX-809  
258 treatment, and these were further enhanced by genistein by 1.5-fold (up to  $11.35 \pm 0.90$   
259  $\mu A/cm^2$ ). In contrast, CFTR rescue in the SMADi<sup>ALI</sup> cultures was significantly smaller with  
260 or without genistein potentiation (**Fig 5C**).  $\Delta I_{sc-Fsk}$  values in SMADi ALI cultures increased



261 by 4-fold ( $1.16 \pm 0.14$  to  $4.97 \pm 0.52 \mu\text{A}/\text{cm}^2$ ) following VX-809-treatment, which were  
262 further potentiated 1.8- fold ( $8.94 \pm 0.85 \mu\text{A}/\text{cm}^2$ ) with genistein.

263

264 To confirm currents were mediated by the CFTR chloride channel, we used CFTR-specific  
265 inhibitor (CFTR<sub>Inh</sub>-172), which almost completely abolished the currents evoked by forskolin  
266 + genistein in both cultures, with trends that mirror those of total stimulated CFTR-dependent  
267 currents (**Fig 5D**).

268

#### 269 **4. DISCUSSION**

270 Airway epithelial cell models are becoming important pre-clinical tools for personalised CF  
271 medicine. Therefore, a better understanding of the impact of culture expansion techniques on  
272 CFTR function is warranted. We focused on F508del-CFTR as this is the most prevalent  
273 mutation in the CFTR gene. 90% of patients with CF have at least one F508del mutation (22).  
274 Two expansion methods that were shown to yield more cells than the methodology using  
275 conventional Bronchial Epithelial Cell Growth Medium (BEGM) were tested. At the  
276 expansion phase, the morphology of CRC cells were distinct from the SMADi cells, although  
277 both had the typical epithelial cobblestone phenotype. In general, the SMADi monolayer  
278 presented a more neatly organised cobblestone morphology than the CRC counterpart. These  
279 appearances were consistent with those reported in previous studies (16, 19). Our studies  
280 showed that the population doubling was significantly higher in CRC HNE compared to  
281 SMADi HNE, although, the rate of growth of both cultures were largely similar.

282

283 When CRC<sup>ALI</sup> and SMADi<sup>ALI</sup> were differentiated using the same protocol, no significant  
284 difference in markers of mucociliary differentiation was observed. Despite similar cilia  
285 abundance between the two cultures, a significantly lower CBF was observed in the  
286 SMADi<sup>ALI</sup> when compared to the CRC<sup>ALI</sup>. TGF- $\beta$  has been shown to reduce CBF and ASL  
287 volume in CF bronchial epithelial cells, although the role of CFTR was not interrogated in the  
288 same studies (23). TGF- $\beta$ /SMAD/BMP signalling pathways directly regulate CFTR function  
289 and biogenesis, as well as epithelial cell behaviour (proliferation, differentiation) (24-27).  
290 Potentially, TGF- $\beta$ /SMAD/BMP signalling has a regulatory role in the mucociliary clearance  
291 in a similar manner to the regulation of the CFTR function, although the exact mechanism  
292 requires further investigation.

293

294 Despite the lack of observed differences in the tight junction (ZO-1) and adherence junction  
295 (e-cad) distribution, SMADi<sup>ALI</sup> cultures displayed ~1.2-fold higher transepithelial electrical  
296 resistance (TEER) values compared to CRC cultures. This indicates neither expansion culture  
297 method compromises epithelial tight junction formation after differentiation. This is  
298 important for CF research as electrically tight epithelia is pre-requisite to allow for CFTR  
299 function measurement (Ussing chamber) (20, 28).

300

301 VX-809 is the corrector agent in the first drug (Orkambi) approved for clinical treatment of  
302 individuals with homozygous F508del CFTR genotype. It acts by correcting CFTR protein  
303 folding and trafficking. A routine *in vitro* assay to characterise CFTR activity in F508del uses

304 treatment with corrector VX-809 to test the rescue of CFTR. 48h treatment with VX-809  
305 demonstrated detectable changes in CFTR function across both the expansion culture types.  
306 Donor-to-donor heterogeneity in VX-809 rescue was also seen. CF SMADi cultures  
307 evidenced a marked decrease in CFTR mediated Cl<sup>-</sup> currents compared to CRC<sup>ALI</sup> cultures.  
308 Furthermore, our non-CF SMADi<sup>ALI</sup> cultures exhibited severe down-regulation of CFTR  
309 activity compared to CRC<sup>ALI</sup> cultures. Because both cultures were subjected to identical  
310 differentiation conditions, any disparity observed in the differentiated CRC<sup>ALI</sup> and SMADi<sup>ALI</sup>  
311 cultures would be attributed to the distinct expansion conditions. We hypothesise that the  
312 attenuated CFTR activity in SMADi<sup>ALI</sup> cultures could be as a result of a epigenetic  
313 remodelling, perhaps a carry-over effect of one or a combination of SMAD inhibitors, used  
314 during the expansion phase. Epithelial ion channel function has been shown to be sensitive to  
315 epigenetic changes, even when gross differentiation potential is preserved (18, 29).

316

317 The (ir)reversibility of the SMAD inhibitors effects on CFTR have not been reported. A83-01  
318 acts through blocking Smad2/3 activity while DMH1 blocks Smad 1/5/8 (30, 31). This  
319 combination abrogates the actions of all SMAD family proteins, the transcription factors  
320 downstream of the growth factor and cytokine TGF- $\beta$  (32). The relationship of TGF- $\beta$  and  
321 CFTR is complex. TGF- $\beta$  is a well-known genetic modifier of CF lung disease progression  
322 with certain polymorphisms of the TGF- $\beta$  having been associated with a more severe CF  
323 phenotype (33, 34). TGF- $\beta$  expression in human lung tissue does not appear de-regulated in  
324 CF when compared to healthy control, but TGF- $\beta$  signalling (phosphorylated Smad2  
325 expression) was found to be upregulated (35). In CF patients, the levels of TGF- $\beta$  in their  
326 blood serum increased during disease exacerbation and *P. aeruginosa* infection (36). In  
327 addition, TGF- $\beta$  significantly down-regulates the level of CFTR mRNA and cAMP-  
328 dependent CFTR currents in cultures established from non-CF nasal polyps (37). TGF- $\beta$  also  
329 inhibited VX-809 corrected F508del CFTR in colonic and human airway epithelial cells (24,  
330 38, 39). Given the evidence for the negative regulatory role of TGF- $\beta$  on CFTR, we expected  
331 that TGF- $\beta$  inhibitors A83-01 and DMH1 effect would manifest as increased CFTR activity  
332 in the SMADi<sup>ALI</sup> cultures.

333

334 With TGF- $\beta$  pleiotropic activity (32), it is possible for inhibition of TGF- $\beta$ /SMAD pathways  
335 to act upon and down-regulate the CFTR function. This is entirely plausible given Smad3  
336 expression is reduced in nasal epithelial tissues of 18 CF patients compare to five healthy  
337 controls despite enhanced TGF- $\beta$  signalling reported in separate studies (35, 40). The reduced  
338 Smad3 levels in CF airways can explain the relative insensitivity/smaller disparity in CFTR  
339 function elicited in the CF CRC vs. SMADi cultures when compared to non-CF cultures. On  
340 the other hand, we did not observe any significant changes in the basal activity of ATP  
341 activated CaCC currents between the two cultures from the CF and non-CF individuals. We  
342 thus suggest that SMAD inhibitory effect is likely to be CFTR-specific.

343

344 It appears that the alteration of cellular physiological function *in vitro* occurs more easily than  
345 structural and differentiation potential. We cannot ascertain which one of the two culture  
346 expansion methods studied here correlates more with the *in vivo* CFTR function, since none



347 of the donors in this study were receiving CFTR modulator therapy. It is necessary to  
348 recognise the limitations of *in vitro* cultures as pre-clinical models for CF. Culture conditions  
349 significantly influence CFTR activity. This could lead to false conclusions when data from  
350 various labs are compared against each other. With the current variety of techniques in use, it  
351 is important to compare like for like and report a patient's cell model's response to drugs  
352 against technique/lab specific references. Moving forward, a standardised protocol to expand  
353 and differentiate patient airway epithelial cells is needed across CF labs to ensure consistency  
354 in *in vitro* data and, ultimately, translation of clinical care to patients.  
355

356 **Acknowledgements**

357 We thank the study participants and their families for their contributions. We appreciate the  
358 assistance from Sydney Children's Hospitals (SCH) Randwick respiratory department in  
359 organization and collection of patient biospecimens – special thanks to Dr John Widger, Dr  
360 Yvonne Belessis, Leanne Plush, Amanda Thompson and Rhonda Bell. This work was  
361 supported by Australian National Health and Medical Research Council  
362 (NHMRC\_APP1188987), Cystic Fibrosis Australia, Sydney Children Hospital Foundation  
363 and Luminesce Alliance Research grants. We thank Dr. John R. Riordan (University of North  
364 Carolina – Chapel Hill) and Cystic Fibrosis Foundation for providing anti-CFTR antibodies  
365 #570, 596, 769, 450 and 528.

366

367 **Author contributions**

368 Funding acquisition: SAW, AJ. Conceptualization, design and supervision: SAW. Consent  
369 and biospecimens collection: LKF, AJ. Patient samples processing: NT, NTA and SLW.  
370 Experimental work, data analysis and interpretation: NTA, SLW, EP, IS, LZ, AC and SAW.  
371 Manuscript writing: SLW, NTA and SAW with intellectual input from all authors.

372

373

374 **Conflict of interest**

375 The authors declare that they have no conflict of interest.

376

377

378

379 **References**

- 380 1. Ratjen F, Bell SC, Rowe SM, Goss CH, Quittner AL, Bush A. Cystic fibrosis. Nature  
381 reviews Disease primers. 2015;1:15010.
- 382 2. Wainwright CE, Elborn JS, Ramsey BW. Lumacaftor-Ivacaftor in Patients with  
383 Cystic Fibrosis Homozygous for Phe508del CFTR. The New England journal of medicine.  
384 2015;373(18):1783-4.
- 385 3. Donaldson SH, Pilewski JM, Griese M, Cooke J, Viswanathan L, Tullis E, et al.  
386 Tezacaftor/Ivacaftor in Subjects with Cystic Fibrosis and F508del/F508del-CFTR or  
387 F508del/G551D-CFTR. American journal of respiratory and critical care medicine.  
388 2018;197(2):214-24.
- 389 4. Van Goor F, Hadida S, Grootenhuis PD, Burton B, Cao D, Neuberger T, et al. Rescue  
390 of CF airway epithelial cell function in vitro by a CFTR potentiator, VX-770. Proceedings of  
391 the National Academy of Sciences of the United States of America. 2009;106(44):18825-30.
- 392 5. Davies JC, Moskowitz SM, Brown C, Horsley A, Mall MA, McKone EF, et al. VX-  
393 659-Tezacaftor-Ivacaftor in Patients with Cystic Fibrosis and One or Two Phe508del Alleles.  
394 The New England journal of medicine. 2018;379(17):1599-611.
- 395 6. Van Goor F, Hadida S, Grootenhuis PD, Burton B, Stack JH, Straley KS, et al.  
396 Correction of the F508del-CFTR protein processing defect in vitro by the investigational drug  
397 VX-809. Proceedings of the National Academy of Sciences of the United States of America.  
398 2011;108(46):18843-8.
- 399 7. Matthes E, Goepf J, Martini C, Shan J, Liao J, Thomas DY, et al. Variable Responses  
400 to CFTR Correctors in vitro: Estimating the Design Effect in Precision Medicine. Frontiers in  
401 pharmacology. 2018;9:1490.
- 402 8. Clancy JP, Cotton CU, Donaldson SH, Solomon GM, VanDevanter DR, Boyle MP, et  
403 al. CFTR modulator therotyping: Current status, gaps and future directions. Journal of cystic  
404 fibrosis : official journal of the European Cystic Fibrosis Society. 2018.
- 405 9. Imkamp K, Berg M, Vermeulen CJ, Heijink IH, Guryev V, Kerstjens HAM, et al.  
406 Nasal epithelium as a proxy for bronchial epithelium for smoking-induced gene expression  
407 and expression Quantitative Trait Loci. The Journal of allergy and clinical immunology.  
408 2018;142(1):314-7.e15.
- 409 10. Boudewijn IM, Faiz A, Steiling K, van der Wiel E, Telenga ED, Hoonhorst SJM, et  
410 al. Nasal gene expression differentiates COPD from controls and overlaps bronchial gene  
411 expression. Respiratory research. 2017;18(1):213.
- 412 11. Brewington JJ, Filbrandt ET, LaRosa FJ, 3rd, Moncivaiz JD, Ostmann AJ, Strecker  
413 LM, et al. Brushed nasal epithelial cells are a surrogate for bronchial epithelial CFTR studies.  
414 JCI insight. 2018;3(13).
- 415 12. Hayes D, Jr., Kopp BT, Hill CL, Lallier SW, Schwartz CM, Tadesse M, et al. Cell  
416 Therapy for Cystic Fibrosis Lung Disease: Regenerative Basal Cell Amplification. Stem cells  
417 translational medicine. 2019;8(3):225-35.

- 418 13. Supryniewicz FA, Upadhyay G, Krawczyk E, Kramer SC, Hebert JD, Liu X, et al.  
419 Conditionally reprogrammed cells represent a stem-like state of adult epithelial cells.  
420 Proceedings of the National Academy of Sciences of the United States of America.  
421 2012;109(49):20035-40.
- 422 14. Liu X, Ory V, Chapman S, Yuan H, Albanese C, Kallakury B, et al. ROCK inhibitor  
423 and feeder cells induce the conditional reprogramming of epithelial cells. The American  
424 journal of pathology. 2012;180(2):599-607.
- 425 15. Reynolds SD, Rios C, Wesolowska-Andersen A, Zhuang Y, Pinter M, Happoldt C, et  
426 al. Airway Progenitor Clone Formation Is Enhanced by Y-27632-Dependent Changes in the  
427 Transcriptome. American journal of respiratory cell and molecular biology. 2016;55(3):323-  
428 36.
- 429 16. Mou H, Vinarsky V, Tata PR, Brazauskas K, Choi SH, Crooke AK, et al. Dual  
430 SMAD Signaling Inhibition Enables Long-Term Expansion of Diverse Epithelial Basal Cells.  
431 Cell stem cell. 2016;19(2):217-31.
- 432 17. Levardon H, Yonker LM, Hurley BP, Mou H. Expansion of Airway Basal Cells and  
433 Generation of Polarized Epithelium. Bio-protocol. 2018;8(11).
- 434 18. Gentzsch M, Boyles SE, Cheluvvaraju C, Chaudhry IG, Quinney NL, Cho C, et al.  
435 Pharmacological Rescue of Conditionally Reprogrammed Cystic Fibrosis Bronchial  
436 Epithelial Cells. American journal of respiratory cell and molecular biology. 2017;56(5):568-  
437 74.
- 438 19. Martinovich KM, Iosifidis T, Buckley AG, Looi K, Ling KM, Sutanto EN, et al.  
439 Conditionally reprogrammed primary airway epithelial cells maintain morphology, lineage  
440 and disease specific functional characteristics. Scientific reports. 2017;7(1):17971.
- 441 20. Gianotti A, Delpiano L, Caci E. In vitro Methods for the Development and Analysis  
442 of Human Primary Airway Epithelia. Frontiers in pharmacology. 2018;9:1176.
- 443 21. Pranke IM, Hatton A, Simonin J, Jais JP, Le Pimpec-Barthes F, Carsin A, et al.  
444 Correction of CFTR function in nasal epithelial cells from cystic fibrosis patients predicts  
445 improvement of respiratory function by CFTR modulators. Scientific reports.  
446 2017;7(1):7375.
- 447 22. CFTR2. CFTR2 database. Clinical and Functional Translation of CFTR 2020  
448 [Available from: <http://cftr2.org/>].
- 449 23. Manzanares D, Krick S, Baumlin N, Dennis JS, Tyrrell J, Tarran R, et al. Airway  
450 Surface Dehydration by Transforming Growth Factor beta (TGF-beta) in Cystic Fibrosis Is  
451 Due to Decreased Function of a Voltage-dependent Potassium Channel and Can Be Rescued  
452 by the Drug Pirfenidone. The Journal of biological chemistry. 2015;290(42):25710-6.
- 453 24. Snodgrass SM, Cihil KM, Cornuet PK, Myerburg MM, Swiatecka-Urban A. Tgf-  
454 beta1 inhibits Cfr biogenesis and prevents functional rescue of DeltaF508-Cfr in primary  
455 differentiated human bronchial epithelial cells. PloS one. 2013;8(5):e63167.

- 456 25. Sun H, Harris WT, Kortyka S, Kotha K, Ostmann AJ, Rezayat A, et al. Tgf-beta  
457 downregulation of distinct chloride channels in cystic fibrosis-affected epithelia. *PloS one*.  
458 2014;9(9):e106842.
- 459 26. Feldman MB, Wood M, Lapey A, Mou H. SMAD Signaling Restricts Mucous Cell  
460 Differentiation In Human Airway Epithelium. *American journal of respiratory cell and*  
461 *molecular biology*. 2019.
- 462 27. Tadokoro T, Gao X, Hong CC, Hotten D, Hogan BL. BMP signaling and cellular  
463 dynamics during regeneration of airway epithelium from basal progenitors. *Development*  
464 (Cambridge, England). 2016;143(5):764-73.
- 465 28. Li H, Sheppard DN, Hug MJ. Transepithelial electrical measurements with the Ussing  
466 chamber. *Journal of Cystic Fibrosis*. 2004;3:123-6.
- 467 29. Zhang C, Lee HJ, Shrivastava A, Wang R, McQuiston TJ, Challberg SS, et al. Long-  
468 Term In Vitro Expansion of Epithelial Stem Cells Enabled by Pharmacological Inhibition of  
469 PAK1-ROCK-Myosin II and TGF-beta Signaling. *Cell reports*. 2018;25(3):598-610.e5.
- 470 30. Mohedas AH, Xing X, Armstrong KA, Bullock AN, Cuny GD, Yu PB. Development  
471 of an ALK2-biased BMP type I receptor kinase inhibitor. *ACS Chem Biol*. 2013;8(6):1291-  
472 302.
- 473 31. Tojo M, Hamashima Y, Hanyu A, Kajimoto T, Saitoh M, Miyazono K, et al. The  
474 ALK-5 inhibitor A-83-01 inhibits Smad signaling and epithelial-to-mesenchymal transition  
475 by transforming growth factor-beta. *Cancer Sci*. 2005;96(11):791-800.
- 476 32. Zhang YE, Newfeld SJ. Meeting report - TGF-beta superfamily: signaling in  
477 development and disease. *J Cell Sci*. 2013;126(Pt 21):4809-13.
- 478 33. Drumm ML, Konstan MW, Schluchter MD, Handler A, Pace R, Zou F, et al. Genetic  
479 modifiers of lung disease in cystic fibrosis. *The New England journal of medicine*.  
480 2005;353(14):1443-53.
- 481 34. Arkwright PD, Laurie S, Super M, Pravica V, Schwarz MJ, Webb AK, et al. TGF-  
482 beta(1) genotype and accelerated decline in lung function of patients with cystic fibrosis.  
483 *Thorax*. 2000;55(6):459-62.
- 484 35. Harris WT, Kelly DR, Zhou Y, Wang D, MacEwen M, Hagood JS, et al.  
485 Myofibroblast differentiation and enhanced TGF-B signaling in cystic fibrosis lung disease.  
486 *PloS one*. 2013;8(8):e70196.
- 487 36. Sagwal S, Chauhan A, Kaur J, Prasad R, Singh M, Singh M. Association of Serum  
488 TGF-beta1 Levels with Different Clinical Phenotypes of Cystic Fibrosis Exacerbation. *Lung*.  
489 2020;198(2):377-83.
- 490 37. Pruliere-Escabasse V, Fanen P, Dazy AC, Lechapt-Zalcman E, Rideau D, Edelman A,  
491 et al. TGF-beta 1 downregulates CFTR expression and function in nasal polyps of non-CF  
492 patients. *American journal of physiology Lung cellular and molecular physiology*.  
493 2005;288(1):L77-83.



- 494 38. Lutful Kabir F, Ambalavanan N, Liu G, Li P, Solomon GM, Lal CV, et al.  
495 MicroRNA-145 Antagonism Reverses TGF-beta Inhibition of F508del CFTR Correction in  
496 Airway Epithelia. *American journal of respiratory and critical care medicine*.  
497 2018;197(5):632-43.
- 498 39. Howe KL, Wang A, Hunter MM, Stanton BA, McKay DM. TGFbeta down-regulation  
499 of the CFTR: a means to limit epithelial chloride secretion. *Exp Cell Res*. 2004;298(2):473-  
500 84.
- 501 40. Megiorni F, Cialfi S, Cimino G, De Biase RV, Dominici C, Quattrucci S, et al.  
502 Elevated levels of miR-145 correlate with SMAD3 down-regulation in cystic fibrosis  
503 patients. *Journal of cystic fibrosis : official journal of the European Cystic Fibrosis Society*.  
504 2013;12(6):797-802.
- 505 41. Cox J, Mann M. MaxQuant enables high peptide identification rates, individualized  
506 p.p.b.-range mass accuracies and proteome-wide protein quantification. *Nature*  
507 *biotechnology*. 2008;26(12):1367-72.
- 508 42. Cox J, Neuhauser N, Michalski A, Scheltema RA, Olsen JV, Mann M. Andromeda: a  
509 peptide search engine integrated into the MaxQuant environment. *Journal of proteome*  
510 *research*. 2011;10(4):1794-805.
- 511 43. Cox J, Hein MY, Luber CA, Paron I, Nagaraj N, Mann M. Accurate Proteome-wide  
512 Label-free Quantification by Delayed Normalization and Maximal Peptide Ratio Extraction,  
513 Termed MaxLFQ. *Molecular & Cellular Proteomics*. 2014;13(9):2513-26.  
514  
515  
516

517 **Supplementary Files:**

518

519 **SUPPLEMENTARY MATERIALS and METHODS**

520 **Study Participants**

521 Paediatric CF patients with homozygous F508del-CFTR (n=9) and non-CF controls (n=5)  
522 were included in this study (**Table S1**). No study participant was on CFTR modulator therapy  
523 prior to sample acquisition. This study was approved by the Sydney Children's Hospital  
524 Ethics Review Board (HREC/16/SCHN/120), and written informed consent was obtained  
525 from the guardians of all participants.

526

527 **Nasal airway cell procurement and processing**

528 Primary human nasal epithelial (HNE) cells were obtained through cytology brushing of the  
529 nasal inferior turbinate of CF participants during annual surveillance clinic or bronchoscopy.  
530 Nasal brushings for non-CF participants were collected during elective bronchoscopy or non-  
531 respiratory related investigative procedures. HNE cells were dislodged from cytology brushes  
532 by gentle vortexing in collection media. Cells were pelleted at 300 g for 5 min at 4°C,  
533 resuspended with the expansion culture media specified below, and passed through a 40 µm  
534 cell strainer (Sigma CLS431750) to generate single-cell suspension. Cells were then seeded  
535 equally into flasks for serial expansion using two culture methods, conditionally  
536 reprogrammed cell (CRC) culture and feeder-free dual SMAD inhibition (SMADi) culture.

537

538 **Conditionally reprogrammed cell (CRC) expansion culture – co-culture method**

539 Isolated HNE cells were co-cultured with irradiated NIH/3T3 feeder cells (culture details  
540 below) in F-media containing Rho kinase (ROCK) inhibitor, Y-27632 as described  
541 previously (14). HNE cells were added to collagen I-coated flask pre-seeded with mitotically  
542 arrested NIH/3T3 feeder cells in F-media (**Table S2**), and media change was performed every  
543 second day until 80-90% confluence. Cells were dissociated using a differential trypsin  
544 method. Cells were neutralized with trypsin neutralizing solution (Lonza CC-5034), and cell  
545 count was performed using Countess II  
546 automated cell counter (Thermo Fisher Scientific, Waltham, MA) according to the  
547 manufacturer's instructions and then seeded for ALI cultures or cryopreserved.

548

549 **NIH/3T3 feeder cell culture and irradiation**

550 NIH/3T3 mouse embryonic fibroblast cell line was cultured at 37°C, 5% CO<sub>2</sub> in DMEM  
551 (Life Technologies 11965-092) supplemented with 10% FBS, 100 U/ml penicillin and 100  
552 µg/ml streptomycin. When indicated for gamma-irradiation, cells at 70-80% confluency were  
553 trypsinized, and pelleted cells were resuspended in fresh culture media. The cell suspension  
554 was exposed to 30 Gy gamma-irradiation (J.L. Shepherd & Associates, San Fernando, CA)  
555 and then seeded into flasks coated with collagen I (PureCol; Advanced Biomatrix 5005) at a  
556 density of 5000 cells/cm<sup>2</sup>.

557

558 **Dual SMAD inhibition (SMADi) expansion culture – serum and feeder-free method**

559 Isolated HNE cells were seeded into a collagen I-coated flask, as described previously with  
560 minor modifications (16). Cells were cultured in Bronchial Epithelial Cell Medium

561 (BEpiCM) (ScienCell Research Laboratories 3211) supplemented with 1  $\mu$ M A83-01 (Tocris  
562 Bioscience 2939), 1  $\mu$ M DMH1 (Selleckchem S7146), 3.3 nM EC23 (Enzo Life Sciences  
563 BML-EC23-0500) and 10  $\mu$ M Y-27632. Media change was performed every second day until  
564 80-90% confluence. Cells were dissociated with trypsin/EDTA (Lonza CC-5034) for 5-7 min  
565 at 37°C and neutralized with trypsin neutralizing solution (Lonza CC-5034). Cell count was  
566 performed using Countess II automated cell counter according to the manufacturer's  
567 instructions and then seeded for ALI cultures or cryopreserved.

568

### 569 **Mucociliary differentiation at air-liquid interface (ALI)**

570 Passage one, donor-matched HNE CRC- and SMADi-expanded cells were seeded on  
571 Transwell 6.5mm, 0.4 $\mu$ m pore polyester membrane inserts (0.33cm<sup>2</sup> area; Sigma CLS3470)  
572 pre-coated with collagen I (PureCol; Advanced Biomatrix 5005), at a density of 150,000  
573 cells/insert till confluence. Once confluent under submerged conditions (approximately 4-5  
574 days), cells were switched to air-liquid interface (ALI) culture condition, whereby apical  
575 media was removed, and PneumaCult ALI differentiation media (STEMCELL Technologies,  
576 05001) was added to the basolateral compartment only. Basal media change was performed  
577 every second day for 3-4 weeks. Beating cilia (ciliogenesis) and mucus production were  
578 monitored using light microscopy. The apical surface was washed with warm phosphate  
579 buffered saline (PBS) once a week to remove excess mucus. After 21-25 days, Ussing  
580 chamber measurements were carried out with the resistance values above 200  $\Omega$ .cm<sup>2</sup>. ALI  
581 cultures established from HNE CRC- and SMADi-expanded cells were incubated (basolateral  
582 side) with 3  $\mu$ M VX-809 (Selleckchem S1565), a CFTR corrector compound or DMSO  
583 0.1%v/v (vehicle) for 48 h.

584

### 585 **Short circuit current measurements in Ussing chambers**

586 HNE ALI Transwell inserts were mounted in circulating Ussing chambers (VCC MC8  
587 multichannel voltage/current clamp; Physiologic Instruments). Three to six transwells were  
588 tested per donor per condition. The short circuit current  $I_{sc}$  and transepithelial resistance were  
589 measured under voltage-clamp conditions. For  $I_{sc}$  recordings, a basolateral-to-apical  $Cl^-$   
590 secretory gradient was created using asymmetric chloride ( $Cl^-$ ) Ringer's buffer. The  
591 basolateral  $Cl^-$  solution contained (mM): 145 NaCl, 3.3  $K_2HPO_4$ , 1.2  $CaCl_2$ , 1.2  $MgCl_2$ , 10  
592 HEPES and 10 glucose, pH 7.4. The composition of apical low- $Cl^-$  solution was the same  
593 apart from the replacement of NaCl with equimolar Na-gluconate. Ringer's buffers were  
594 continuously gassed with 95%  $O_2$ -5%  $CO_2$  and maintained at 37°C. Following a 30min  
595 stabilisation period cells were treated with pharmacological compounds (in order): 100  $\mu$ M  
596 amiloride (apical) to inhibit epithelial sodium channel (ENaC)-mediated  $Na^+$  flux, 10  $\mu$ M  
597 forskolin (basal) to induce cAMP activation of CFTR, 50  $\mu$ M genistein (apical) to further  
598 potentiate cAMP-activated currents, 30  $\mu$ M CFTR<sub>inh</sub>-172 (apical) to inhibit CFTR-specific  
599 currents and 100  $\mu$ M ATP (apical) to activate purinergic calcium-activated chloride currents.  
600 Cumulative changes of  $I_{sc}$  in response to forskolin and genistein ( $\Delta I_{sc-Fsk+Gen}$ ) was used as an  
601 indicator of maximum CFTR function. Data recordings were acquired using Acquire and  
602 Analyze (version 2.3) software (Physiologic Instruments).

603

## 604 **Sample preparation for Mass Spectrometry**

605 ALI differentiated HNEC cultures untreated or treated with VX-809 were harvested for mass  
606 spectrometry. Total protein was extracted by homogenizing the cells in RIPA buffer (Life  
607 Technologies 89900) containing protease inhibitor cocktail (Sigma 11836153001). Samples  
608 were sonicated using the Bioruptor Pico (Diagenode B01060010) for a total of 10 min using a  
609 30 sec on/off cycle at 4°C. Protein concentrations were determined using the 2-D Quant kit  
610 (GE Life Sciences 80648356). Samples were reduced (5 mM DTT, 37°C, 30 min), alkylated  
611 (10 mM IA, RT, 30 min) then incubated with trypsin at a protease:protein ratio of 1:20 (w/w)  
612 at 37°C for 18 h, before being subjected to SCX clean-ups (Thermo Fisher, SP341) following  
613 manufacturer's instructions. Eluted peptides from each clean-up were evaporated to dryness  
614 in a SpeedVac and reconstituted in 20 µL 0.1% (v/v) formic acid, 0.05% HFBA and 2%  
615 acetonitrile.

616

## 617 **Mass Spectrometry**

618 Proteolytic peptide samples were separated by nanoLC using an Ultimate nanoRSLC UPLC  
619 and autosampler system (Dionex, Amsterdam, Netherlands. A micro C18 precolumn with  
620 H<sub>2</sub>O:CH<sub>3</sub>CN (98:2, 0.1 % TFA) at 15 µL/min and a fritless nano column (75 µm x 15 cm)  
621 containing C18-AQ media (Dr Maisch, Ammerbuch-Entringen Germany) was used to  
622 concentrate and desalt samples. Peptides were eluted through a linear gradient of  
623 H<sub>2</sub>O:CH<sub>3</sub>CN (98:2, 0.1 % formic acid) to H<sub>2</sub>O:CH<sub>3</sub>CN (64:36, 0.1 % formic acid) at 200  
624 nL/min over 30 min. Eluted peptides were ionized using positive ion mode nano-ESI by  
625 applying 2000 volts to a low volume titanium union with the tip positioned ~0.5 cm from the  
626 heated capillary (T=275°C) of a Tribrid Fusion Lumos mass spectrometer (Thermo  
627 Scientific, Bremen, Germany).

628

629 A survey scan *m/z* 350-1750 was acquired in the orbitrap (resolution = 120,000 at *m/z* 200,  
630 with an accumulation target value of 400,000 ions) and lockmass enabled (*m/z* 445.12003).  
631 Data dependant acquisition was used to sequentially select peptide ions (>2.5×10<sup>4</sup> counts,  
632 charge states +2 to +5) for MS/MS, with the total number of dependent scans maximized  
633 within 2 sec cycle times. Product ions were generated via higher energy collision dissociation  
634 (collision energy = 30; maximum injection time = 250 milliseconds; MS<sub>n</sub> AGC = 5×10<sup>4</sup>;  
635 inject ions for all available parallelizable time enabled) and mass analyzed in the linear ion  
636 trap. Dynamic exclusion was enabled and set to: n times =1, exclusion duration 20 seconds, ±  
637 10ppm. Mass spectrometry data are available at the ProteomeXchange Consortium via the  
638 PRIDE partner repository with the dataset identifier PXD018386  
639 (<https://www.ebi.ac.uk/pride/archive/projects/PXD018386>). Full list of identified proteins  
640 and differentially abundant protein analysis is available upon request.

641

## 642 **Protein identification, quantification and statistical analysis**

643 LC-MS/MS raw files were analysed using the MaxQuant software suite (version 1.6.2.10.43)  
644 (41). Sequence database searches were performed using Andromeda (42). Label-free protein  
645 quantification was performed using the MaxLFQ algorithm (43). Delayed normalizations  
646 were performed following sequence database searching of all samples with tolerances set to  
647 ±4.5 ppm for precursor ions and ±0.5 Da for peptide fragments. Additional search parameters

648 were: carbamidomethyl (C) as a fixed modification; oxidation (M) and N-terminal protein  
649 acetylation as variable modifications; and enzyme specificity was trypsin with up to two  
650 missed cleavages. Peaks were searched against the human Swiss-Prot database (August 2018  
651 release), which contained 20333 sequences with the minimum peptide length set as 7.  
652 MaxLFQ analyses were performed using default parameters with “fast LFQ” enabled. Protein  
653 and peptide false discovery rate (FDR) thresholds were set at 1% and only non-contaminant  
654 proteins identified from  $\geq 2$  unique peptides were subjected to downstream analysis.

655  
656 Statistical analyses of protein abundances were performed with Perseus (version 1.6.5.0)  
657 platform. Hits only identified by site, reverse hits and potential contaminants were filtered  
658 out. Only proteins that were present in 3 out of 6 replicates were retained. Protein intensities  
659 were  $\log_2$ -transformed. Missing values were added from normal distribution. Student’s t-tests  
660 were performed with Benjamini-Hochberg correction to identify differentially abundant  
661 proteins (q-value < 0.05). Volcano plots were constructed using t-test with 250  
662 randomizations.

663

#### 664 **Cilia beating frequency measurement**

665 Cilia beating were imaged in transmission light modality using ORCA-Flash 4.0 sCMOS  
666 camera (Hamamatsu Photonics, Shizuoka Pref., Japan), connected to Zeiss Axio Observer  
667 Z.1 inverted microscope (Carl Zeiss, Jena, Germany). Images were acquired serially at 334  
668 frames per second (fps) with 3 ms exposure time, on a EC Plan-Neofluar 20x/0.5 Ph2 M27  
669 dry objective (512 x 512 pixels field of view; 0.325  $\mu\text{m}$  x 0.325  $\mu\text{m}$  per pixel). Five to seven  
670 time-series were sampled at random from triplicate filters per treatment condition. Imaging  
671 was performed at 37°C, 5% CO<sub>2</sub> to mimic the physiological environment. To extract cilia  
672 beating spectra and corresponding beating frequency, image series were analysed using a  
673 custom-built script in Matlab (MathWorks, Natick, MA). Briefly, imported image series were  
674 filtered to remove the immobile component in each pixel by subtracting the temporal average  
675 image, or the DC component. This step ensures that all mucus and other immobile structures  
676 producing high scattering in the transmitted image series are excluded from analysis, and  
677 only the moving (mobile) parts of the images are processed for spectra and beating frequency  
678 recovery. The temporal spectrum for each pixel in the image series was then computed using  
679 the Fast Fourier Transform (FFT) algorithm. The peaks in the spectrum indicate frequencies  
680 at which the temporal pixel intensity oscillates. The average spectrum per field of view was  
681 calculated using the average of all the single pixel spectra. The dominant frequency (a  
682 frequency with the highest peak) was then identified using the Matlab function ‘findpeaks’.

683

#### 684 **Whole mount immunofluorescence**

685 After completion of short-circuit current measurement, HNE ALI cultures were washed with  
686 PBS at room temperature for three times, 5 min each (Sigma D8662) and fixed.  
687 Immunostaining was performed only on cells pre-incubated with DMSO (vehicle) for 48 h or  
688 with no pre-incubation. Different fixative solutions were used depending on the target  
689 protein. For staining of mucociliary differentiation markers (**Table S3**), cells were fixed in  
690 4% paraformaldehyde for 15 min at room temperature or in methanol-acetone (1:1) for 15  
691 min at -20°C, and then permeabilized with 0.5% Triton-X in PBS on ice for 10min. For



692 CFTR staining, cells were fixed in ice-cold acetone for 15min at -20°C with no  
693 permeabilization step. Fixed, permeabilized cells on transwell membranes were rinsed with  
694 PBS 3 times and blocked using IF buffer (0.1% BSA, 0.2% Triton and 0.05% Tween 20 in  
695 PBS) with 10% normal goat serum for 1 hour at room temperature. Membranes were excised  
696 from transwell inserts using a sharp scalpel (size 11) at the end of the blocking step and cut  
697 into 2 or 3 equal pieces. Cells were then incubated in primary antibodies (**Table S3**)  
698 overnight at 4°C on SuperFrost Plus slides (Thermo Fisher Scientific, Waltham, MA). Cells  
699 were washed with IF buffer (3X, 5 min each) and incubated with Alexa Fluor conjugated  
700 secondary antibodies (**Table S3**) for 1 hour at room temperature. Cells were washed with IF  
701 buffer (3X, 5min each) and mounted with Vectashield hardset antifade mounting medium  
702 containing DAPI (H-1500; Vector Laboratories, Burlingame, CA). Images were acquired  
703 using Leica TCS SP8 DLS confocal microscope (Leica Microsystems, Wetzlar, Germany),  
704 63x/1.4 oil immersion objective. Images were then processed using ImageJ software  
705 (National Institute of Health, Bethesda, MD)

706

### 707 **Statistical analysis**

708 Data were presented as means  $\pm$  standard error of the mean (SEM). The two-tailed student's  
709 t-test was used to determine the differences between the two groups. Statistical analysis was  
710 performed with GraphPad Prism 8 software (GraphPad Software, San Diego, CA).  $P < 0.05$   
711 was considered to be statistically significant.

712

713

714

715 **Table S1.** Demographics of study participants from whom HNE cells were cultured.

716

| <b>Donor</b> | <b>CFTR Genotype</b> | <b>Age (yr)</b> | <b>Sex</b> | <b>Pancreatic Insufficiency</b> | <b>Sweat Chloride (mmol/l)</b>                     |
|--------------|----------------------|-----------------|------------|---------------------------------|----------------------------------------------------|
| D1           | F508del/F508del      | 8.59            | F          | Yes                             | 110<br>(21/01/2019)                                |
| D2           | F508del/F508del      | 2.91            | M          | Yes                             | 88<br>(04/05/2016)                                 |
| D3           | F508del/F508del      | 6.56            | M          | Yes                             | Insufficient sample<br>in 2011 not tested<br>since |
| D4           | F508del/F508del      | 9.02            | M          | Yes                             | 90<br>(06/07/2009)                                 |
| D5           | F508del/F508del      | 2.06            | F          | Yes                             | 96<br>(15/05/2016)                                 |
| D6           | F508del/F508del      | 0.92            | M          | Yes                             | 95<br>(17/01/2017)                                 |
| D7           | F508del/F508del      | 2.98            | M          | Yes                             | Not tested                                         |
| D8           | F508del/F508del      | 17.50           | F          | Yes                             | Not tested                                         |
| D9           | F508del/F508del      | 4.02            | F          | Yes                             | 102<br>(13/02/2020)                                |
| D10          | wt/wt                | 0.93            | M          | No                              | NA                                                 |
| D11          | wt/wt                | 4.04            | M          | No                              | NA                                                 |
| D12          | wt/wt                | 1.18            | M          | No                              | NA                                                 |
| D13          | wt/wt                | 11.59           | M          | No                              | NA                                                 |
| D14          | wt/wt                | 8.6             | M          | No                              | NA                                                 |

717

718 Abbreviations: NA, not applicable; M, Male; F, Female; D, Donor; yr, Year

719

720

721

722

723

724

725

726

727

728

729

730

731

732

733 **Table S2.** Components of CRC expansion media

734

735

| <b>Components</b>        | <b>Concentrations</b> | <b>Supplier</b>             |
|--------------------------|-----------------------|-----------------------------|
| DMEM/Ham's F-12          | 67%                   | Life Technologies 11330-032 |
| DMEM, high glucose       | 33%                   | Life Technologies 11965-092 |
| Fetal bovine serum (FBS) | 5%                    | Life Technologies 10082-147 |
| Penicillin-Streptomycin  | 1x                    | Sigma P4333                 |
| Hydrocortisone           | 0.4 µg/ml             | Sigma H0888                 |
| Insulin                  | 5 µg/ml               | Sigma I2643                 |
| Cholera toxin            | 8.4 ng/ml             | Sigma C8052                 |
| hEGF                     | 25 ng/ml              | Sigma E9644                 |
| Adenine                  | 24 µg/ml              | Sigma A2786                 |
| Y-27632                  | 10 µM                 | Selleckchem S1049           |

736 **Table S3.** Antibodies used for immunofluorescence characterization.

737

| <b>Antibody</b>                      | <b>Target</b>               | <b>Supplier</b>            | <b>Catalog Number</b> | <b>Dilution</b> |
|--------------------------------------|-----------------------------|----------------------------|-----------------------|-----------------|
| Monoclonal anti- E-cadherin (HECD-1) | Adherens junction           | Life Technologies          | 13-1700               | 1:250           |
| Monoclonal anti-E-cadherin (24E10)   | Adherens junction           | Cell Signalling Technology | 3195                  | 1:100           |
| Polyclonal anti-ZO-1                 | Tight junction              | Life Technologies          | 61-7300               | 1:250           |
| Monoclonal anti-p63 (EPR5701)        | Basal cell                  | Abcam                      | ab124762              | 1:250           |
| Monoclonal anti-Acetylated Tubulin   | Ciliated cell               | Sigma-Aldrich              | T7451                 | 1:250           |
| Monoclonal anti-MUC5AC (45M1)        | Goblet cell                 | Life Technologies          | MA5-12178             | 1:100           |
| Monoclonal anti-CFTR                 | Cl <sup>-</sup> ion channel | UNC-CH/CFF                 | #450                  | 1:50            |
| Monoclonal anti-CFTR                 | Cl <sup>-</sup> ion channel | UNC-CH/CFF                 | #570                  | 1:50            |
| Monoclonal anti-CFTR                 | Cl <sup>-</sup> ion channel | UNC-CH/CFF                 | #596                  | 1:50            |
| Monoclonal anti-CFTR                 | Cl <sup>-</sup> ion channel | UNC-CH/CFF                 | #769                  | 1:50            |
| Monoclonal anti-CFTR                 | Cl <sup>-</sup> ion channel | UNC-CH/CFF                 | #528                  | 1:50            |
| Alexa Fluor 488 goat anti-mouse IgG  |                             | Life Technologies          | A-11029               | 1:500           |
| Alexa Fluor 555 goat anti-rabbit IgG |                             | Life Technologies          | A-21429               | 1:500           |

738 **Table S4. Differential protein abundance analysis of TGF- $\beta$ /SMAD pathway proteins between**  
 739 **both CF and non-CF CRC and SMADi cultures.**

| Protein                     | Log2 fold-change | p-value    | q-value    |
|-----------------------------|------------------|------------|------------|
| <b>CF CRC vs. SMADi</b>     |                  |            |            |
| CUL1                        | -0.566423098     | 0.00954724 | 0.96373248 |
| MAPK14                      | 0.787147458      | 0.10895098 | 0.96373238 |
| SKP1                        | -0.354222234     | 0.14252945 | 0.96373238 |
| SMAD2;SMAD3                 | -0.296781603     | 0.1856753  | 0.96373238 |
| PPP2R1A                     | -0.168820635     | 0.28337687 | 0.96373248 |
| PPP2CA                      | -0.252598        | 0.28830046 | 0.96373238 |
| MAP2K2                      | 0.181367811      | 0.31165083 | 0.96373238 |
| ITGB1                       | 0.222642326      | 0.33913523 | 0.96373238 |
| MAPK3                       | 0.137226931      | 0.51044733 | 0.96373238 |
| RBX1                        | 0.224527359      | 0.53252339 | 0.96373238 |
| STRAP                       | 0.075380961      | 0.55691665 | 0.96373238 |
| HDAC1                       | -0.094338799     | 0.61290863 | 0.96373238 |
| MAPK1                       | 0.050602595      | 0.74926934 | 0.97586445 |
| SIN3A                       | -0.070233536     | 0.87339451 | 0.97793369 |
| RHOA;RHOC;ARHA              | 0.016871834      | 0.95189139 | 0.98554262 |
| <b>Non-CF CRC vs. SMADi</b> |                  |            |            |
| PPP2R1A                     | -0.124732971     | 0.02124631 | 0.99951841 |
| PPP2CA                      | -0.231428146     | 0.04931977 | 0.99951841 |
| CUL1                        | -0.652365685     | 0.21696662 | 0.99951841 |
| RHOA                        | 0.302098274      | 0.21779762 | 0.99951841 |
| MAPK1                       | -0.119151115     | 0.32568562 | 0.99951841 |
| MAPK3                       | 0.130068779      | 0.55281491 | 0.99951841 |
| RBX1                        | -0.395497322     | 0.6652518  | 0.99951841 |
| SMAD2                       | -0.048676491     | 0.87870185 | 0.99951841 |
| SMAD3                       | -0.048676491     | 0.87870185 | 0.99951841 |
| SKP1                        | 0.054797173      | 0.91473522 | 0.99951841 |
| PPP2CB                      | 0                | NaN        | NaN        |
| ROCK1                       | 0                | NaN        | NaN        |
| SMAD4                       | 0                | NaN        | NaN        |
| SP1                         | 0                | NaN        | NaN        |
| CDKN2B                      | 0                | NaN        | NaN        |

765

766

767

768



**Table S5. Data for the short-circuit currents and electrophysiological parameters in (A) CRC and (B) SMADi ALI cultures from CF and Non-CF donors.** Data represent short circuit current values for Resistance of the monolayers, Amiloride inhibited ENaC currents ( $\Delta$ Amil), Forskolin stimulated cAMP currents alone ( $\Delta$ Fsk), Genistein potentiated currents ( $\Delta$ Fsk + Gen), \*VX-770 potentiated currents ( $\Delta$ Fsk + VX-770), CFTR<sub>inh</sub>-172 inhibited currents ( $\Delta$ Fsk + Gen + CFTR<sub>inh</sub>-172), \*( $\Delta$ Fsk + VX-770 + CFTR<sub>inh</sub>-172), and ATP-activated currents ( $\Delta$ ATP) (Under DMSO and VX-809 treatment). Values represented are after Vehicle or VX-809 (3 $\mu$ M/48h) treatments; (mean  $\pm$  SEM); NA = not applicable and D = Donor.

| A                            | Resistance ( $\Omega$ .cm <sup>2</sup> ) |                   | $\Delta$ Amil ( $\mu$ A/cm <sup>2</sup> ) |                  | $\Delta$ Fsk ( $\mu$ A/cm <sup>2</sup> ) |                  | $\Delta$ Fsk + Gen ( $\mu$ A/cm <sup>2</sup> ) |                  | $\Delta$ Fsk + Gen + CFTR <sub>inh</sub> -172 ( $\mu$ A/cm <sup>2</sup> ) |                   | $\Delta$ ATP ( $\mu$ A/cm <sup>2</sup> ) |                 |
|------------------------------|------------------------------------------|-------------------|-------------------------------------------|------------------|------------------------------------------|------------------|------------------------------------------------|------------------|---------------------------------------------------------------------------|-------------------|------------------------------------------|-----------------|
|                              | DMSO                                     | VX-809            | DMSO                                      | VX-809           | DMSO                                     | VX-809           | DMSO                                           | VX-809           | DMSO                                                                      | VX-809            | DMSO                                     | VX-809          |
| D1                           | 560 $\pm$ 47.50                          | 482 $\pm$ 12.73   | -11.88 $\pm$ 2.29                         | -5.95 $\pm$ 0.92 | 1.99 $\pm$ 0.33                          | 10.09 $\pm$ 0.77 | 3.37 $\pm$ 0.31                                | 12.93 $\pm$ 0.75 | -1.63 $\pm$ 0.26                                                          | -13.38 $\pm$ 1.47 | 5.22 $\pm$ 0.14                          | 4.72 $\pm$ 0.56 |
| D2                           | 469.7 $\pm$ 36.67                        | 474.8 $\pm$ 30.24 | -3.11 $\pm$ 0.39                          | -1.95 $\pm$ 0.38 | 1.32 $\pm$ 0.18                          | 9.02 $\pm$ 0.68  | 3.17 $\pm$ 0.73                                | 15.13 $\pm$ 0.89 | -2.78 $\pm$ 0.32                                                          | -14.17 $\pm$ 1.4  | 1.83 $\pm$ 0.32                          | 0.92 $\pm$ 0.27 |
| D3                           | 756 $\pm$ 40.24                          | 740 $\pm$ 38.94   | -5.70 $\pm$ 0.36                          | -5.20 $\pm$ 0.24 | 1.07 $\pm$ 0.04                          | 6.83 $\pm$ 1.06  | 2.23 $\pm$ 0.27                                | 10.44 $\pm$ 1.32 | -1.46 $\pm$ 0.27                                                          | -8.75 $\pm$ 1.32  | 5.26 $\pm$ 0.61                          | 4.23 $\pm$ 0.25 |
| D4                           | 528.8 $\pm$ 42.48                        | 509.3 $\pm$ 28.58 | -6.35 $\pm$ 0.38                          | -5.83 $\pm$ 0.58 | 2.47 $\pm$ 0.27                          | 15.50 $\pm$ 0.85 | 4.46 $\pm$ 0.33                                | 22.85 $\pm$ 1.24 | -3.88 $\pm$ 0.36                                                          | -19.91 $\pm$ 0.65 | 9.84 $\pm$ 0.35                          | 9.49 $\pm$ 1.43 |
| D5                           | 325.3 $\pm$ 29.31                        | 309.5 $\pm$ 1.50  | -2.350 $\pm$ 0.16                         | -2.19 $\pm$ 0.12 | 1.57 $\pm$ 0.13                          | 6.49 $\pm$ 0.50  | 3.42 $\pm$ 0.41                                | 13.53 $\pm$ 0.63 | -3.30 $\pm$ 0.59                                                          | -9.52 $\pm$ 0.31  | 2.18 $\pm$ 0.24                          | 0.90 $\pm$ 0.14 |
| D6                           | 290.3 $\pm$ 15.32                        | 302 $\pm$ 12.53   | -7.60 $\pm$ 0.23                          | -6.8 $\pm$ 1.11  | 1.80 $\pm$ 0.26                          | 5.39 $\pm$ 0.99  | 2.49 $\pm$ 0.04                                | 7.91 $\pm$ 0.27  | -1.85 $\pm$ 0.30                                                          | -5.45 $\pm$ 0.78  | 11.12 $\pm$ 2.0                          | 10.64 $\pm$ 3.1 |
| D7                           | 474.5 $\pm$ 28.09                        | 506.5 $\pm$ 9.20  | -0.21 $\pm$ 0.05                          | -0.20 $\pm$ 0.09 | 1.53 $\pm$ 0.23                          | 4.25 $\pm$ 0.74  | 3.05 $\pm$ 0.50                                | 7.99 $\pm$ 0.33  | -1.18 $\pm$ 0.15                                                          | -4.18 $\pm$ 0.81  | 1.71 $\pm$ 0.06                          | 1.11 $\pm$ 0.18 |
| D8                           | 461 $\pm$ 10.17                          | 523 $\pm$ 11.33   | -8.74 $\pm$ 0.29                          | -9.02 $\pm$ 0.69 | 0.33 $\pm$ 0.26                          | 4.82 $\pm$ 0.33  | 0.72 $\pm$ 0.34                                | 6.45 $\pm$ 0.74  | -0.83 $\pm$ 0.08                                                          | -6.4 $\pm$ 0.50   | 7.47 $\pm$ 0.64                          | 6.01 $\pm$ 0.33 |
| D9                           | 265.7 $\pm$ 13.86                        | 334.7 $\pm$ 36.29 | -4.06 $\pm$ 0.02                          | -4.95 $\pm$ 1.20 | 0.83 $\pm$ 0.25                          | 3.34 $\pm$ 0.20  | 2.14 $\pm$ 0.33                                | 6.35 $\pm$ 0.40  | -0.87 $\pm$ 0.12                                                          | -4.38 $\pm$ 1.13  | 4.12 $\pm$ 0.27                          | 3.61 $\pm$ 0.51 |
| <b>wt/wt Donors (Non-CF)</b> |                                          |                   |                                           |                  |                                          |                  |                                                |                  |                                                                           |                   |                                          |                 |
| D10                          | 482.3 $\pm$ 45.40                        | NA                | -2.75 $\pm$ 0.09                          | NA               | 31.53 $\pm$ 0.51                         | NA               | 24.85 $\pm$ 0.1                                | NA               | -23.23 $\pm$ 0.08                                                         | NA                | 1.72 $\pm$ 0.14                          | NA              |
| D11                          | 358.2 $\pm$ 9.66                         | NA                | -3.56 $\pm$ 0.44                          | NA               | 34.02 $\pm$ 0.69                         | NA               | 36.62 $\pm$ 0.6                                | NA               | -35.96 $\pm$ 2.21                                                         | NA                | 5.08 $\pm$ 1.03                          | NA              |
| D12                          | 312.6 $\pm$ 25.33                        | NA                | -4.30 $\pm$ 0.35                          | NA               | 26.12 $\pm$ 0.72                         | NA               | 24.56 $\pm$ 0.9                                | NA               | -29.08 $\pm$ 2.33                                                         | NA                | 1.54 $\pm$ 0.39                          | NA              |
| D13                          | 294.3 $\pm$ 29.18                        | NA                | -1.65 $\pm$ 0.14                          | NA               | 15.38 $\pm$ 1.29                         | NA               | 12.95 $\pm$ 1.7                                | NA               | -19.4 $\pm$ 1.47                                                          | NA                | 2.35 $\pm$ 0.13                          | NA              |
| D14                          | 390.7 $\pm$ 3.38                         | NA                | -2.06 $\pm$ 0.13                          | NA               | 15.73 $\pm$ 3.46                         | NA               | 13.57 $\pm$ 3.2                                | NA               | -30.47 $\pm$ 2.97                                                         | NA                | 4.5 $\pm$ 0.11                           | NA              |

  

| B                            | Resistance ( $\Omega$ .cm <sup>2</sup> ) |                   | $\Delta$ Amil ( $\mu$ A/cm <sup>2</sup> ) |                  | $\Delta$ Fsk ( $\mu$ A/cm <sup>2</sup> ) |                  | $\Delta$ Fsk + Gen ( $\mu$ A/cm <sup>2</sup> ) |                  | $\Delta$ Fsk + Gen + CFTR <sub>inh</sub> -172 ( $\mu$ A/cm <sup>2</sup> ) |                   | $\Delta$ ATP ( $\mu$ A/cm <sup>2</sup> ) |                 |
|------------------------------|------------------------------------------|-------------------|-------------------------------------------|------------------|------------------------------------------|------------------|------------------------------------------------|------------------|---------------------------------------------------------------------------|-------------------|------------------------------------------|-----------------|
|                              | DMSO                                     | VX-809            | DMSO                                      | VX-809           | DMSO                                     | VX-809           | DMSO                                           | VX-809           | DMSO                                                                      | VX-809            | DMSO                                     | VX-809          |
| D1                           | 531.5 $\pm$ 20.94                        | 539.8 $\pm$ 25.12 | -4.68 $\pm$ 0.63                          | -4.43 $\pm$ 0.50 | 0.40 $\pm$ 0.14                          | 3.95 $\pm$ 0.54  | 0.77 $\pm$ 0.02                                | 5.67 $\pm$ 0.90  | -1.56 $\pm$ 0.26                                                          | -6.33 $\pm$ 1.05  | 3.01 $\pm$ 0.22                          | 2.66 $\pm$ 0.21 |
| D2                           | 597 $\pm$ 48                             | 704.3 $\pm$ 34.39 | -1.39 $\pm$ 0.16                          | -1.55 $\pm$ 0.18 | 1.58 $\pm$ 0.02                          | 5.05 $\pm$ 0.35  | 4.08 $\pm$ 0.04                                | 14.54 $\pm$ 1.39 | -1.72 $\pm$ 0.11                                                          | -8.18 $\pm$ 0.83  | 1.09 $\pm$ 0.12                          | 0.79 $\pm$ 0.23 |
| D3                           | 819 $\pm$ 84.36                          | 881 $\pm$ 67.00   | -4.83 $\pm$ 0.73                          | -5.06 $\pm$ 0.63 | 0.73 $\pm$ 0.39                          | 4.01 $\pm$ 0.65  | 1.56 $\pm$ 0.72                                | 6.12 $\pm$ 1.18  | -1.19 $\pm$ 0.36                                                          | -6.10 $\pm$ 0.85  | 3.27 $\pm$ 0.25                          | 2.98 $\pm$ 0.38 |
| D4                           | 575.5 $\pm$ 25.59                        | 557.3 $\pm$ 31.31 | -6.26 $\pm$ 0.84                          | -8.10 $\pm$ 0.38 | 2.33 $\pm$ 0.08                          | 12.46 $\pm$ 0.71 | 3.42 $\pm$ 0.44                                | 17.58 $\pm$ 1.96 | -3.83 $\pm$ 0.35                                                          | -20.42 $\pm$ 0.55 | 9.51 $\pm$ 1.68                          | 8.24 $\pm$ 0.46 |
| D5                           | 503.3 $\pm$ 19.34                        | 511.7 $\pm$ 15.92 | -2.30 $\pm$ 0.32                          | -1.62 $\pm$ 0.32 | 1.46 $\pm$ 0.56                          | 4.87 $\pm$ 0.06  | 3.34 $\pm$ 0.77                                | 12.30 $\pm$ 0.33 | -0.98 $\pm$ 1.75                                                          | -7.66 $\pm$ 0.98  | 1.92 $\pm$ 0.18                          | 1.00 $\pm$ 0.10 |
| D6                           | 381 $\pm$ 30.04                          | 405.3 $\pm$ 21.31 | -6.57 $\pm$ 0.47                          | -6.81 $\pm$ 0.20 | 1.37 $\pm$ 0.05                          | 4.85 $\pm$ 0.65  | 1.66 $\pm$ 0.07                                | 7.68 $\pm$ 0.96  | -2.11 $\pm$ 0.29                                                          | -7.70 $\pm$ 1.07  | 6.69 $\pm$ 0.48                          | 6.26 $\pm$ 0.63 |
| D7                           | 603.7 $\pm$ 88.04                        | 630.3 $\pm$ 30.69 | -3.64 $\pm$ 0.48                          | -3.14 $\pm$ 0.24 | 1.86 $\pm$ 0.04                          | 3.86 $\pm$ 0.45  | 3.69 $\pm$ 0.25                                | 7.07 $\pm$ 0.85  | -2.78 $\pm$ 0.34                                                          | -7.72 $\pm$ 0.69  | 2.14 $\pm$ 0.68                          | 1.34 $\pm$ 0.29 |
| D8                           | 322.3 $\pm$ 37.54                        | 415.8 $\pm$ 41.03 | -3.62 $\pm$ 0.90                          | -5.64 $\pm$ 1.51 | 0.55 $\pm$ 0.19                          | 2.35 $\pm$ 0.45  | 1.57 $\pm$ 0.24                                | 3.91 $\pm$ 0.55  | -0.84 $\pm$ 0.14                                                          | -3.74 $\pm$ 0.77  | 3.45 $\pm$ 0.27                          | 4.53 $\pm$ 0.39 |
| D9                           | 577.7 $\pm$ 6.17                         | 608.7 $\pm$ 10.2  | -3.49 $\pm$ 0.31                          | -3.92 $\pm$ 0.27 | 0.34 $\pm$ 0.14                          | 3.59 $\pm$ 0.41  | 1.73 $\pm$ 0.28                                | 6.35 $\pm$ 0.50  | -2.11 $\pm$ 0.06                                                          | -6.66 $\pm$ 1.06  | 3.58 $\pm$ 0.28                          | 3.13 $\pm$ 0.16 |
| <b>wt/wt Donors (Non-CF)</b> |                                          |                   |                                           |                  |                                          |                  |                                                |                  |                                                                           |                   |                                          |                 |
| D10                          | 552.3 $\pm$ 21.85                        | NA                | -1.4 $\pm$ 0.40                           | NA               | 19.07 $\pm$ 0.8                          | NA               | 12.97 $\pm$ 1.1                                | NA               | -16.09 $\pm$ 0.28                                                         | NA                | 1.43 $\pm$ 0.23                          | NA              |
| D11                          | 239 $\pm$ 24.03                          | NA                | 0.23 $\pm$ 0.27                           | NA               | 21.96 $\pm$ 2.6                          | NA               | 27.34 $\pm$ 2.7                                | NA               | -22.55 $\pm$ 6.54                                                         | NA                | 5.06 $\pm$ 2.05                          | NA              |
| D12                          | 352.5 $\pm$ 36.57                        | NA                | -0.5 $\pm$ 0.31                           | NA               | 11.85 $\pm$ 0.3                          | NA               | 11.68 $\pm$ 0.7                                | NA               | -12.93 $\pm$ 1.52                                                         | NA                | 2.77 $\pm$ 0.42                          | NA              |
| D13                          | 517.3 $\pm$ 17.46                        | NA                | -3.0 $\pm$ 0.43                           | NA               | 10.87 $\pm$ 0.5                          | NA               | 7.36 $\pm$ 1.07                                | NA               | -13.87 $\pm$ 0.63                                                         | NA                | 3.73 $\pm$ 0.18                          | NA              |
| D14                          | 327.3 $\pm$ 1.20                         | NA                | -9.9 $\pm$ 0.25                           | NA               | 25.6 $\pm$ 2.06                          | NA               | 20.9 $\pm$ 2.32                                | NA               | -60.37 $\pm$ 3.07                                                         | NA                | 9.83 $\pm$ 0.42                          | NA              |

**A**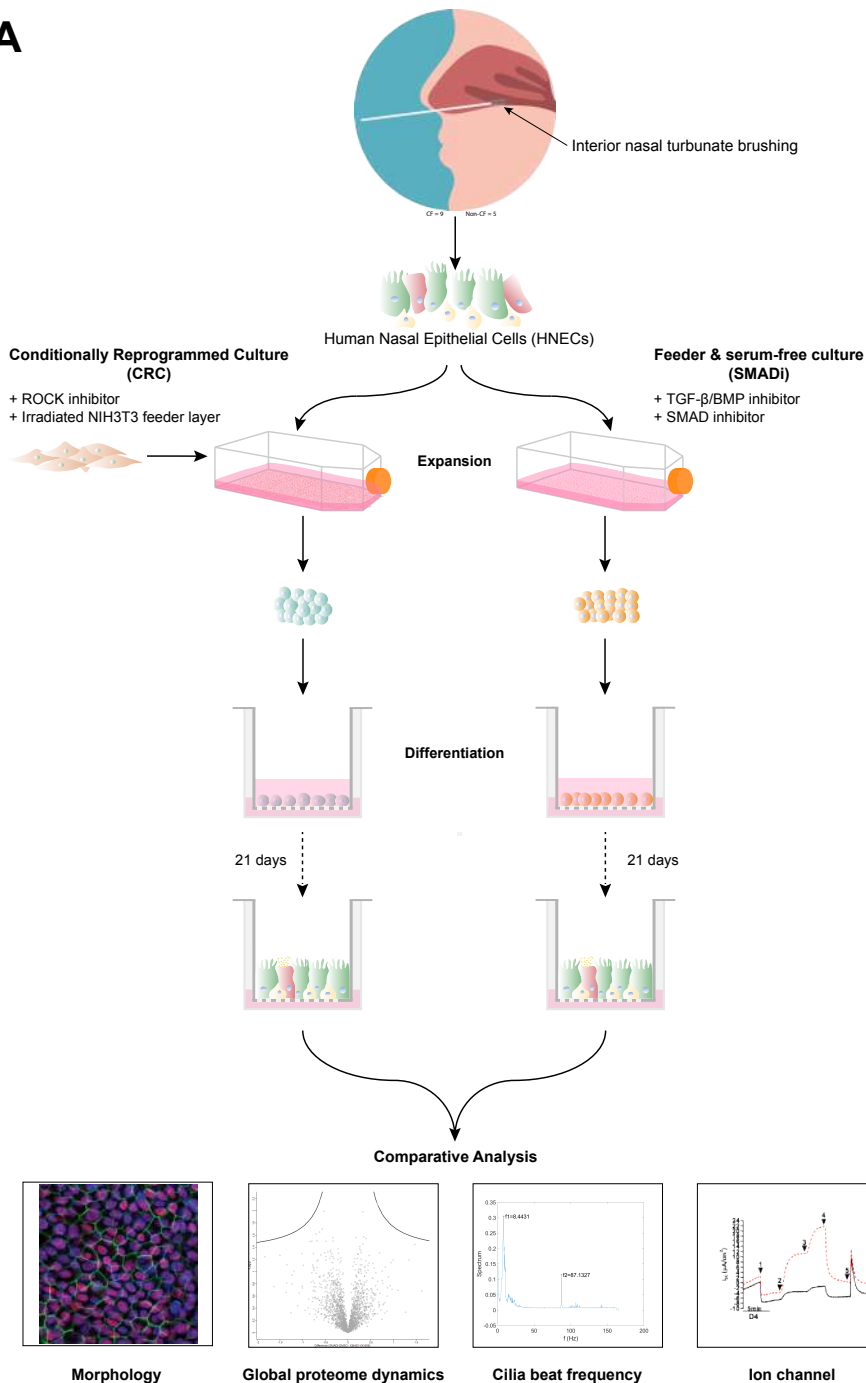**B**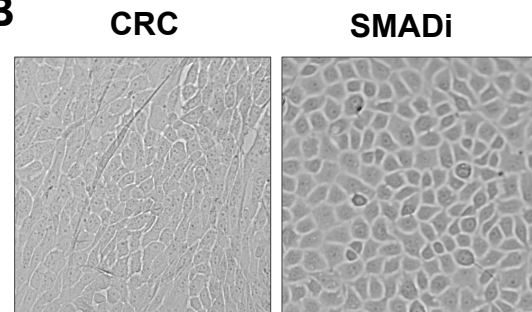**C**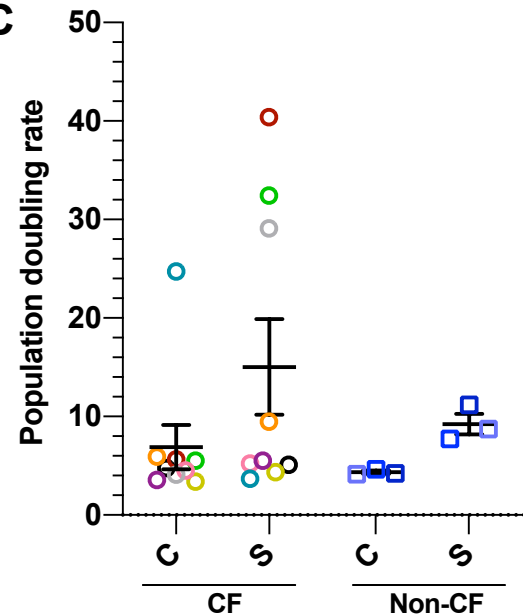

**Fig 1. Expansion of human nasal epithelial (HNE) cells using conditional reprogramming culture (CRC) and dual SMAD inhibition (SMADi) method. (A)** Study design schematic. **(B)** Representative image of CRC HNE cells cultured from a F508del/F508del CF patient using the CRC (left) and SMADi methods. Scale bars = 50 μm. Images are from Donor 5. **(C)** Population doubling rate of CF (n=9) and non-CF (n=5) HNE cells at passage 0. Each coloured circle represents an individual donor. Error bars represent standard error of the mean (Mean ± SEM). A two-tailed Student's t-test was used to determine statistical significance. \* = P ≤ 0.05.

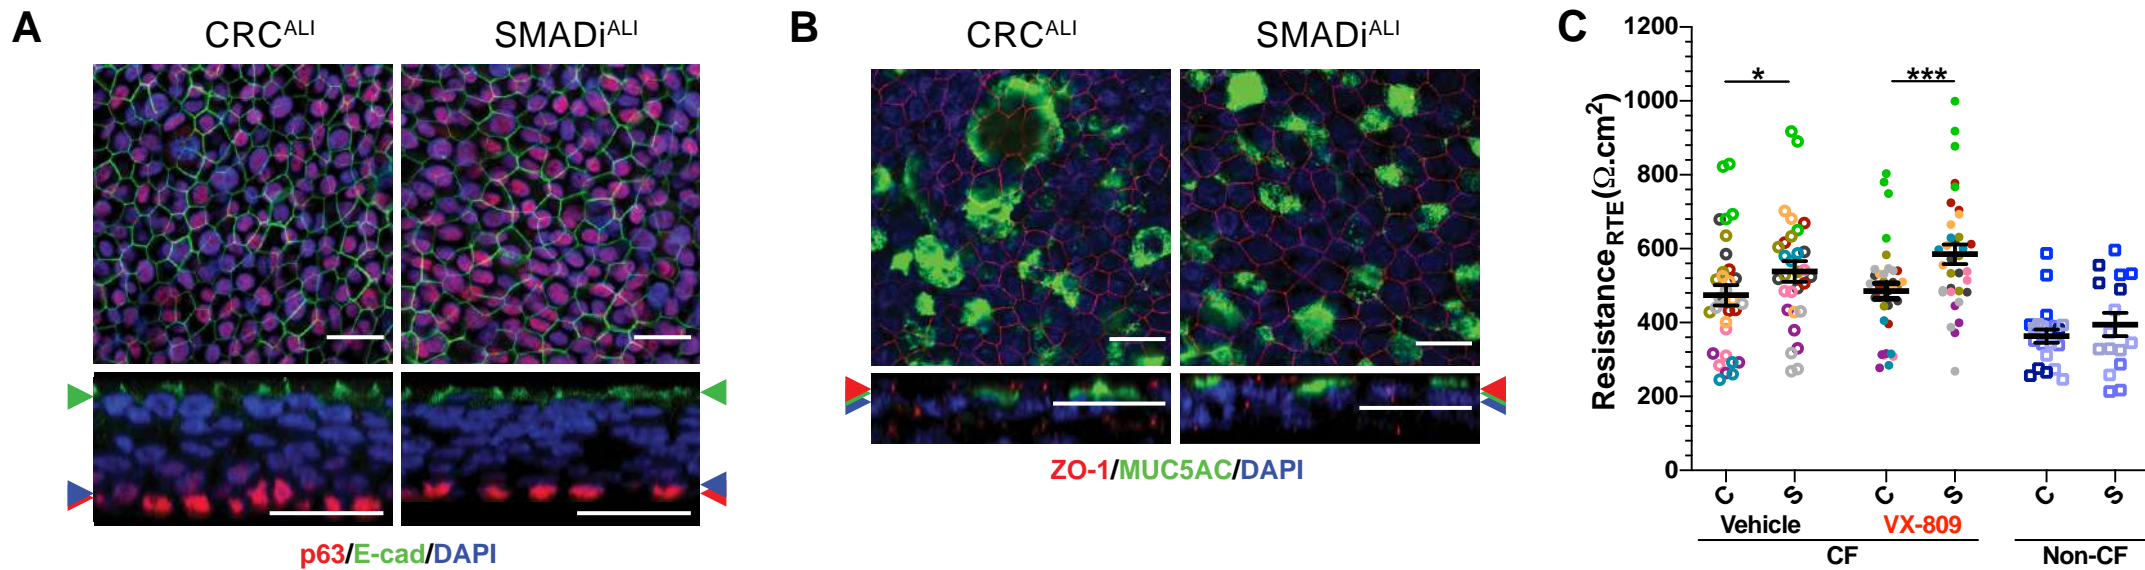

**Fig 2. Structural characterisation of donor matched CRC and SMADi HNE cells grown at Air-Liquid Interface (ALI).** Immunofluorescence staining of **(A)** basal progenitor cells p63<sup>+</sup> (red) and adherens junctions, E-cadherin (green). **(B)** Mucus-producing goblet cells, MUC5AC (green) and tight junctions, ZO-1 (red). **(C)** Trans-epithelial electrical resistance (RTE) values of F508del/F508del CFTR (n=9) with and without VX-809 treatment and WT CFTR (n=5). XY-images shown in all panels are merged from single channel images acquired at Z-planes indicated by coloured arrows. 63x/1.4 oil immersion objective. Scale bars = 20 $\mu\text{m}$ . C = CRC, S = SMADi. Error bars represent standard error of the mean (Mean  $\pm$  SEM). A two-tailed Student's t-test was used to determine statistical significance. \* = P  $\leq$  0.05 and \*\*\* = P  $\leq$  0.001.

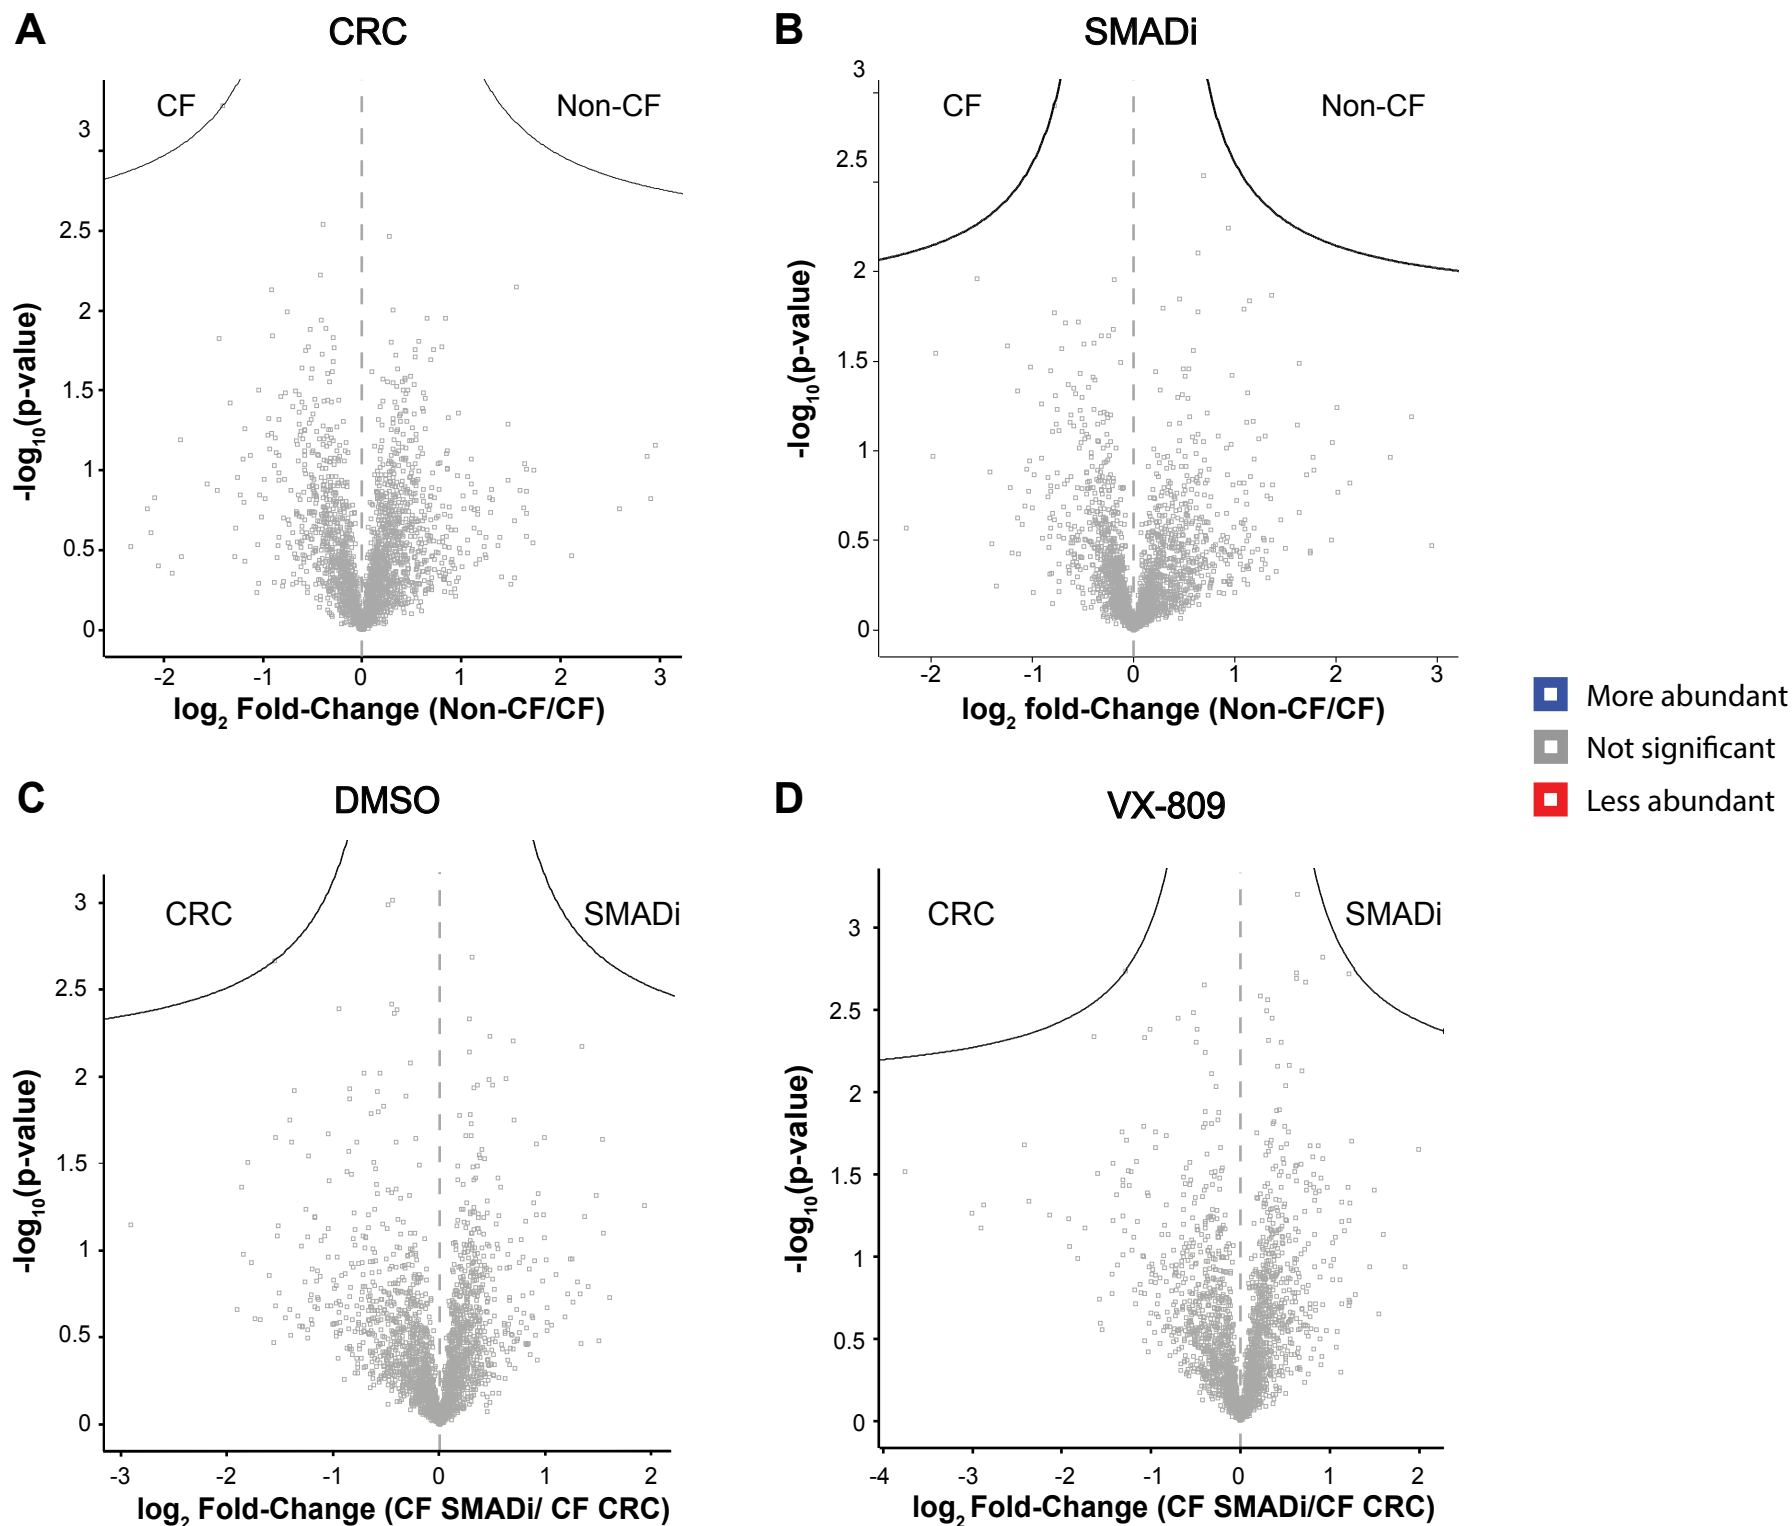

**Fig 3. Global proteomic profiles of seven matched F508del/F508del CF and two non-CF CRC<sup>ALI</sup> vs. SMADi<sup>ALI</sup>.** Volcano plot showing differential protein abundance between (A) Non-CF and CF CRC<sup>ALI</sup> cultures, (B) Non-CF and CF SMADi<sup>ALI</sup> cultures, CF SMADi<sup>ALI</sup> and CF CRC<sup>ALI</sup> cultures with (C) no treatment, and (D) with VX-809 treatment. Cut-off curves indicate significant hits ( $q\text{-value} < 0.05$  and  $\log_2\text{-fold change} > 1$ ).



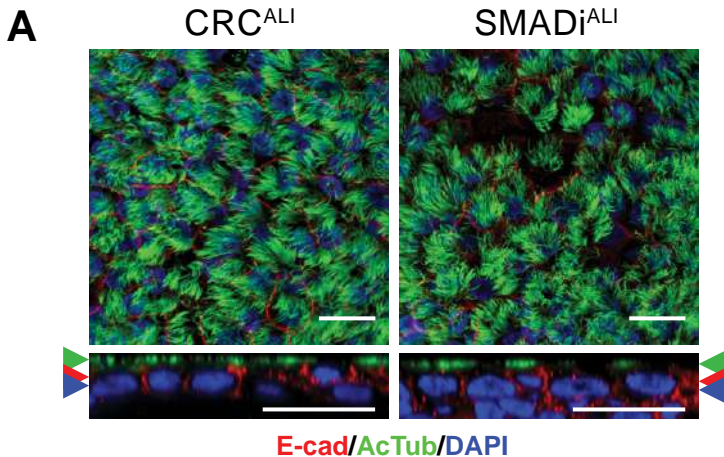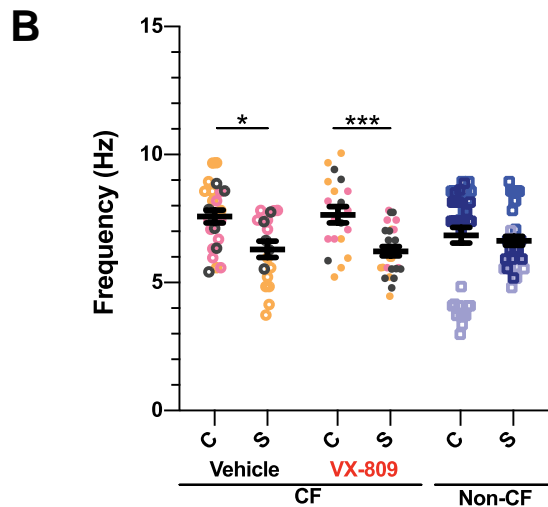

**Fig 4. Ciliated cell marker and Cilia beat frequency (CBF) measurement in matched CRC vs. SMADi HNE ALI cultures. (A)** Ciliated cells acetylated tubulin (green). **(B)** CBF measurements (Hz) in F508del/F508del CFTR (n=3) with and without VX-809 treatment and WT CFTR (n=3). Each coloured dot represents CBF at a field of view. 5-7 different fields of view were sampled per transwell. Dots of the same colour represent the same donor. Open circle represent vehicle (DMSO) treatment and filled circles represent VX-809 treatment for CF donors, and squares indicate non-CF donors. C = CRC, S = SMADi. Error bars represent standard error of the mean (Mean  $\pm$  SEM). A two-tailed Student's t-test was used to determine statistical significance. \* =  $P \leq 0.05$  and \*\*\* =  $P \leq 0.001$ .

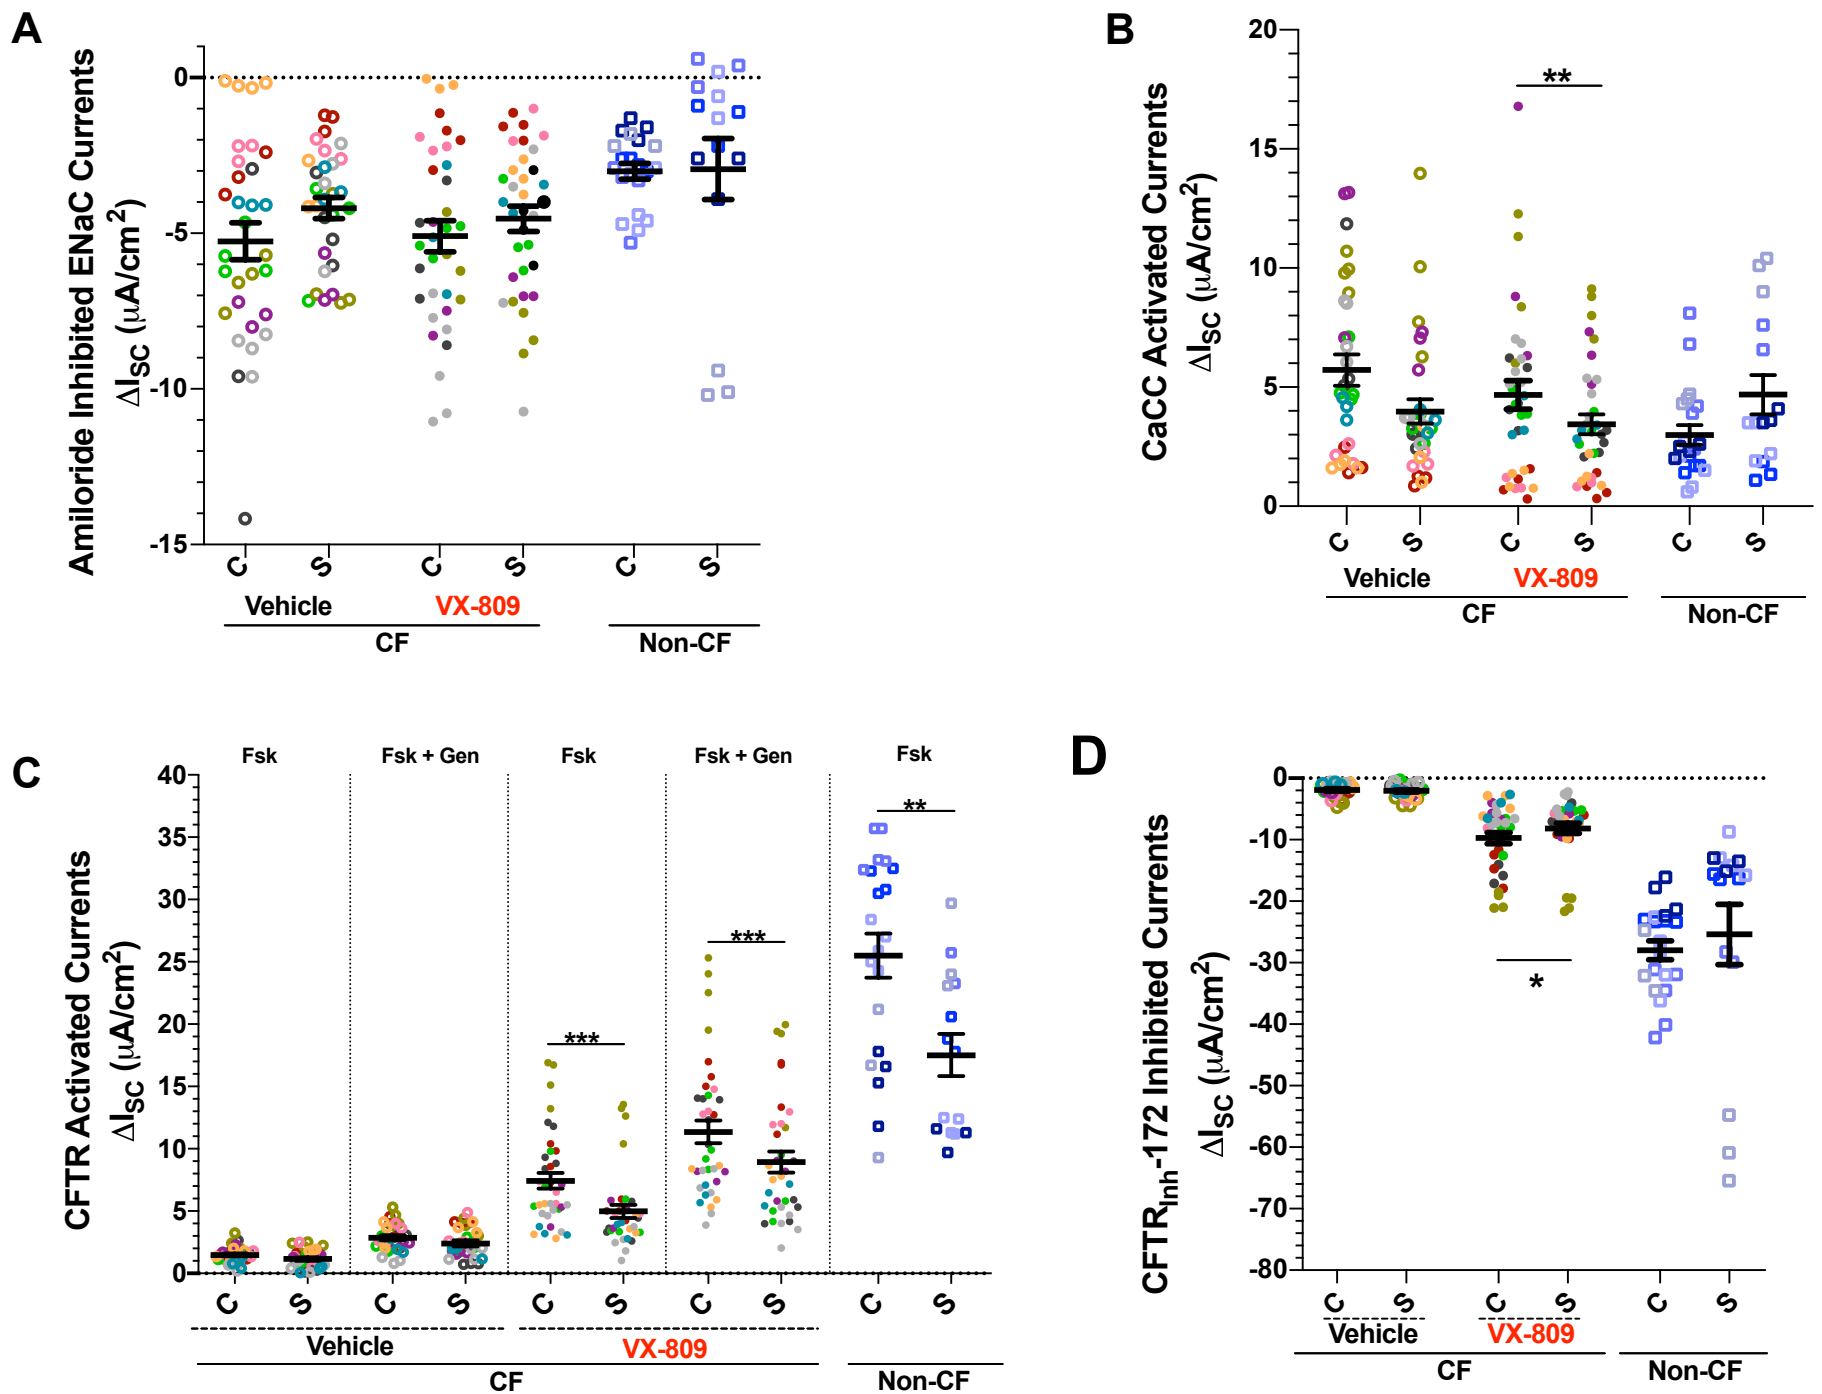

**Fig 5. Ion transport measurements in donor matched CRC and SMADi HNE cells grown at Air-Liquid Interface (ALI).** Dot plots of mean values of short circuit currents ( $\Delta I_{sc}$ ) (**A**) Amiloride-sensitive ENaC currents, (**B**) ATP-activated CaCC, (**C**) CFTR-Forskolin (Fsk) and Fsk+Genestine (Gen) stimulated and (**D**) inhibited CFTR-dependent activity of F508del/F508del CF (n=9) and WT (n=5) HNE cells. To assess CFTR correction, ALI cell models were pre-incubated with 3  $\mu M$  VX-809 or 0.03% DMSO (vehicle) for 48 h. Sequential addition of 10  $\mu M$  Forskolin and 50  $\mu M$  Genistein in asymmetrical chloride concentration. Each coloured dot represents an individual transwell. Dots of the same colour represent the same donor. Open circle represent vehicle (DMSO) treatment and filled circles represent VX-809 treatment for CF donors, and squares indicate non-CF donors. C = CRC, S = SMADi. Error bars represent standard error of the mean (Mean  $\pm$  SEM). A two-tailed Student's t-test was used to determine statistical significance. \* =  $P \leq 0.05$ , \*\* =  $P \leq 0.001$  and \*\*\* =  $P \leq 0.001$ .

CRC<sup>ALI</sup>SMAD<sup>ALI</sup>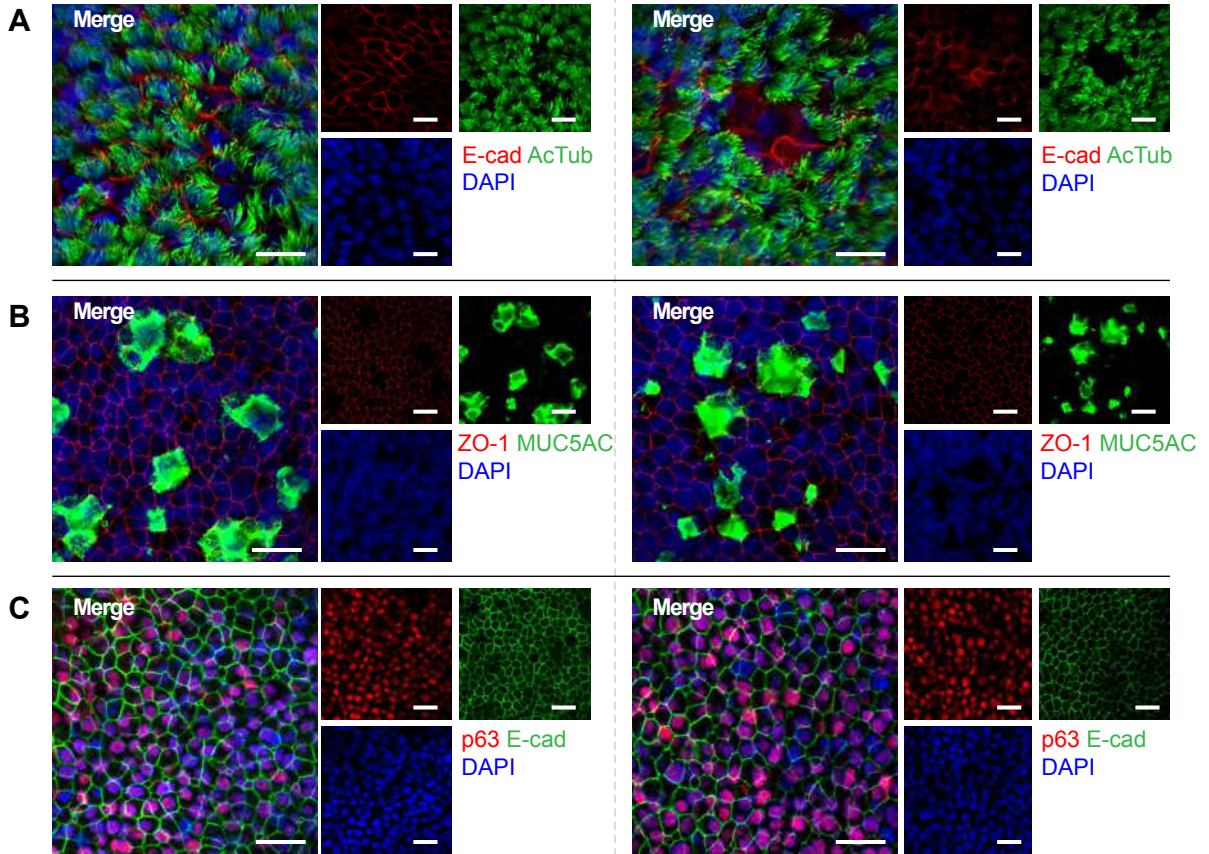

**Fig S1. Pseudostratified CRC and SMADi nasal epithelial cells grown at air-liquid interface characteristic of mature airway epithelium. (A)** Positive staining of acetylated tubulin (ciliated cells; green) and E-cadherin (adherens junction; red) were detected in donor-matched CRC (left panels) and SMADi ALI (right panels) after 21 - 24 days culture. **(B)** Robust expression of MUC5AC (mucus-producing goblet cells; green) and ZO-1 (tight junction; red) were also present. **(C)** p63 (airway basal cell; red) and E-cadherin (green) staining. Images are from Donor 4, F508del/F508del (63x/1.4 oil immersion objective, Zoom 1x). Scale bars = 20 $\mu$ m.



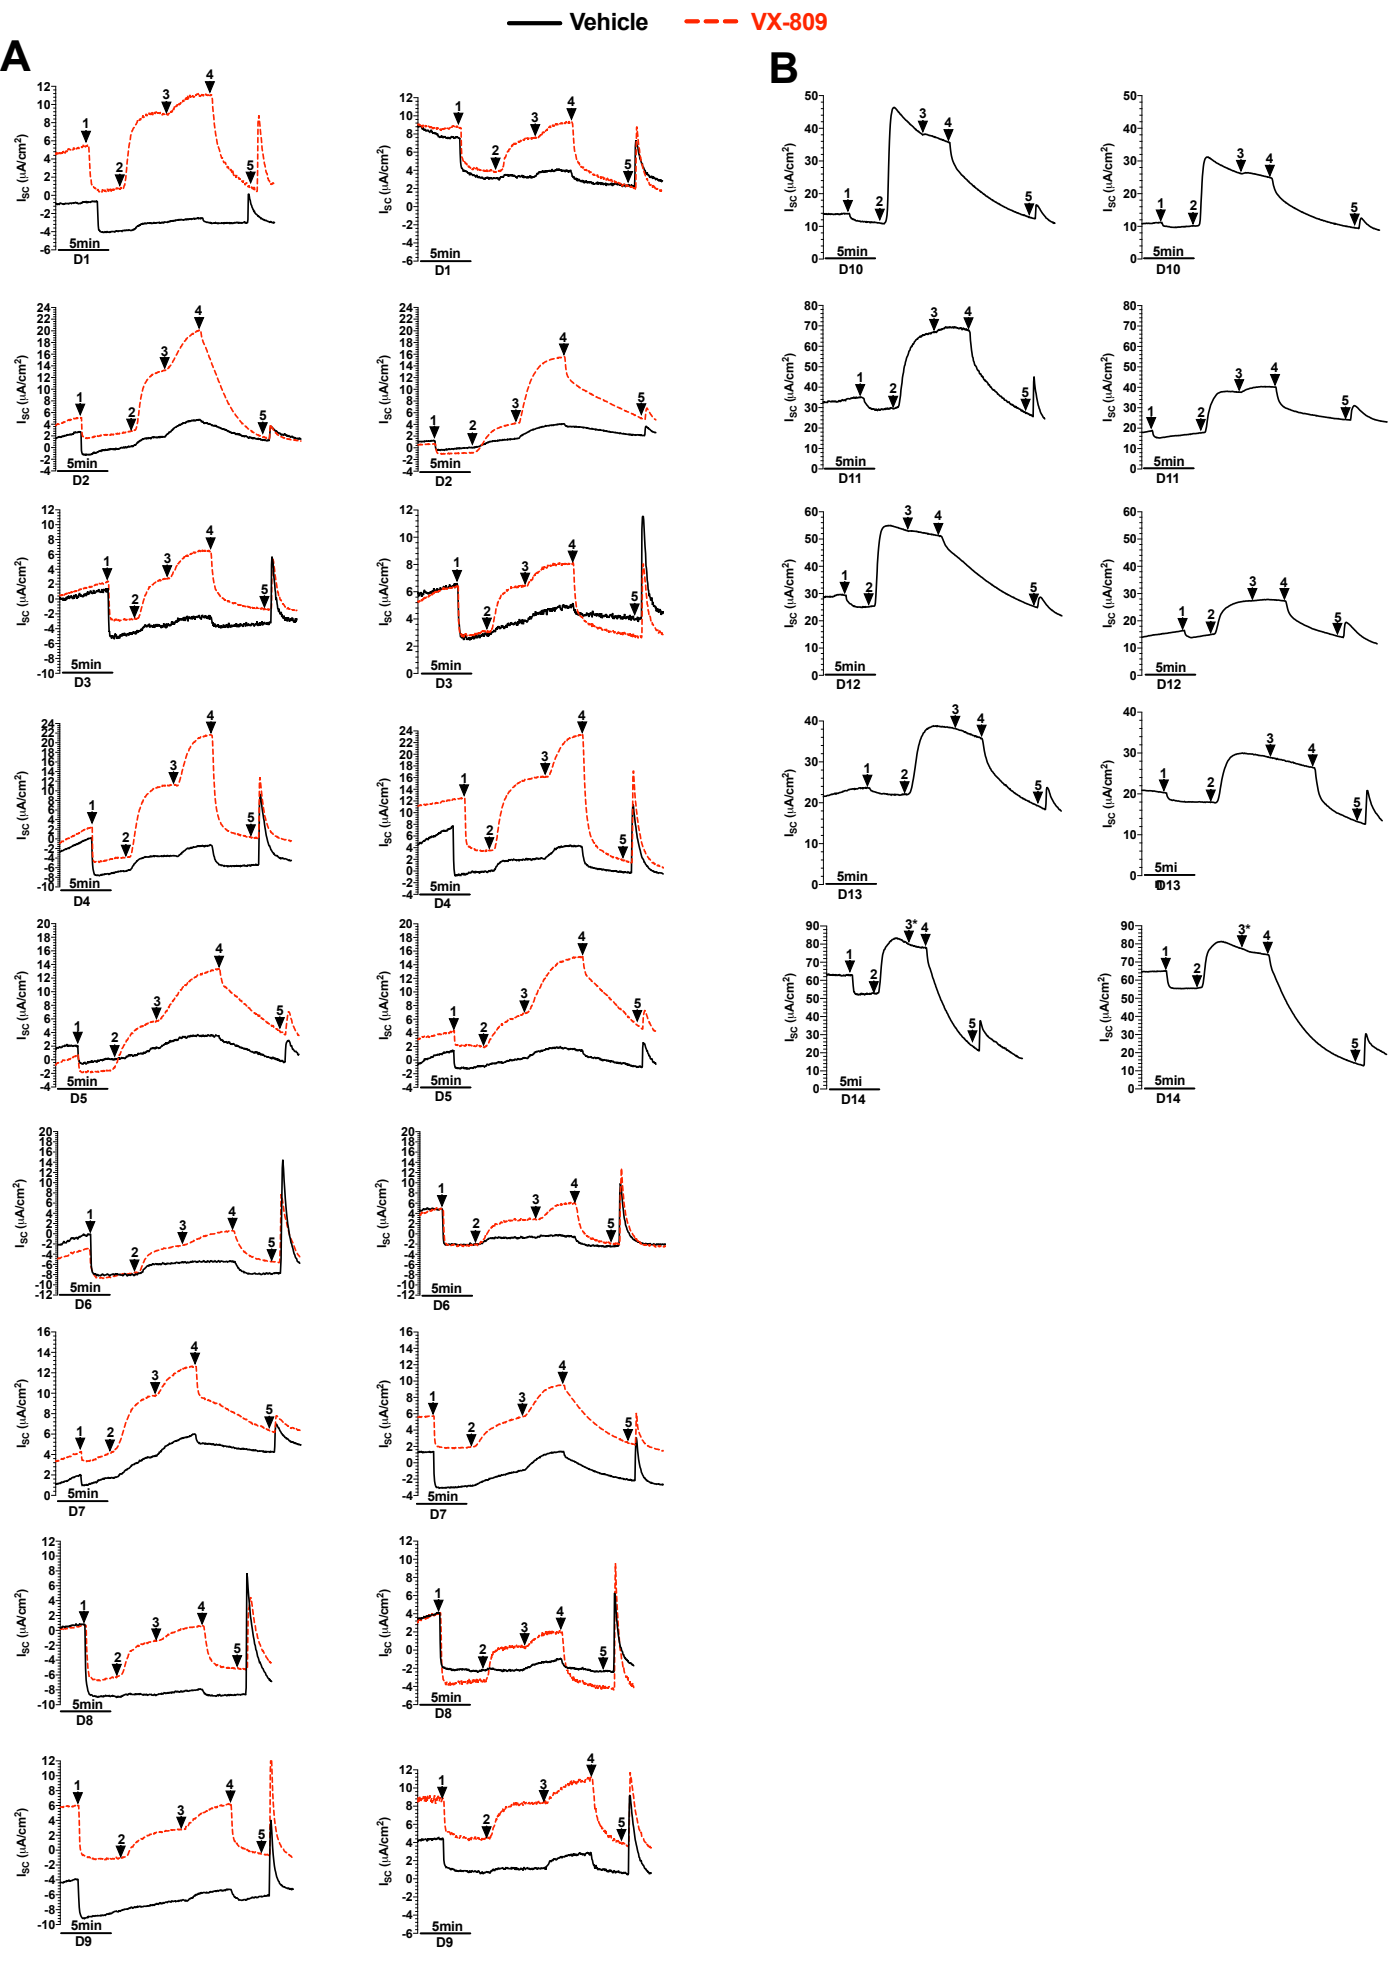

Vehicle

VX-809

A

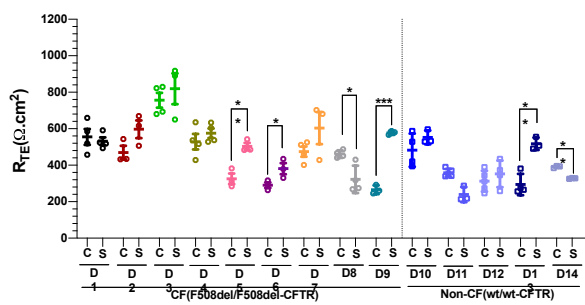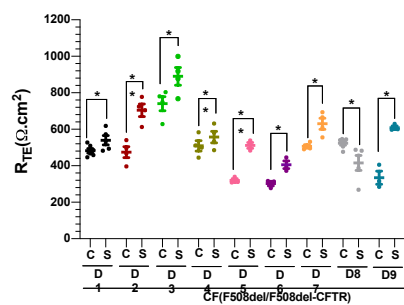

B

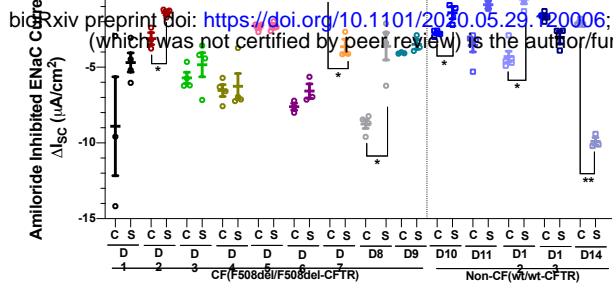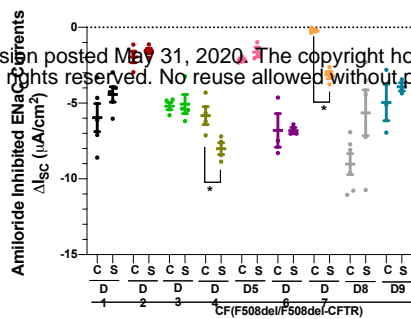

C

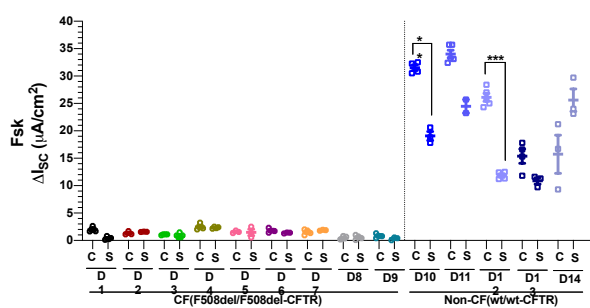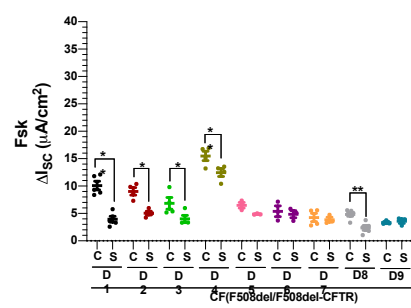

D

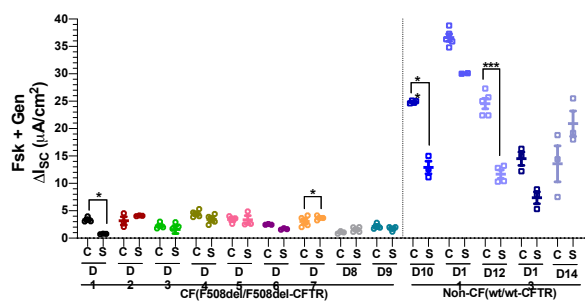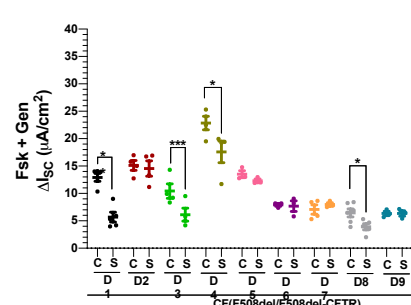

E

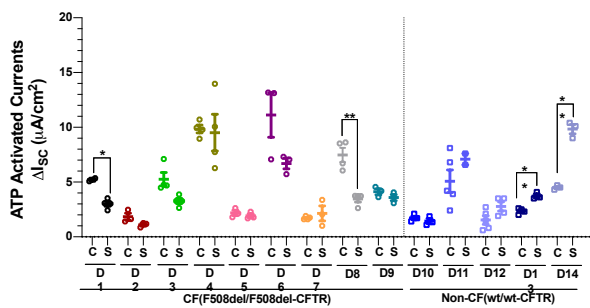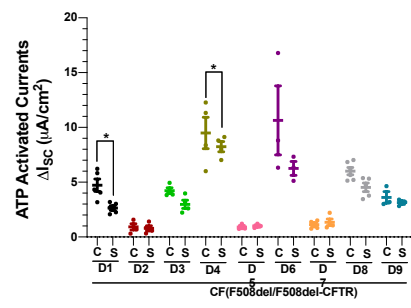

F

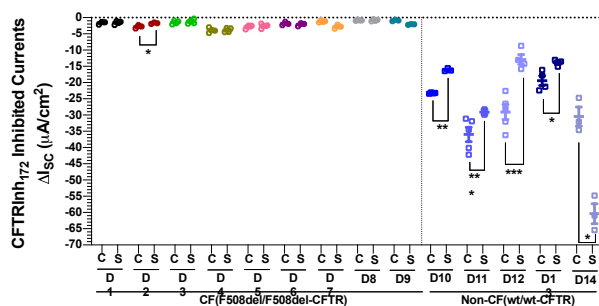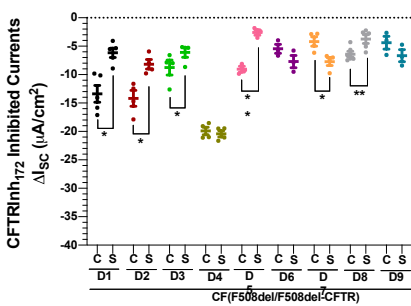

**Fig S3. Intra donor comparison of CRCALI vs. SMADiALI cultures.** (A) Trans-epithelial electrical resistance (RTE), (B) Amiloride-inhibited ENaC current, (C) Forskolin-stimulated current, (D) Forskolin+Genistein-stimulated current, (E) ATP-activated currents, (F) CFTRInh<sub>172</sub>-inhibited current from nine CF donors (D1 to D9) and five non-CF donors (D10 to D14) with or without VX-809 treatment were shown. Each donor is coded with different colour and dotted line separates CF from non-CF donors. Open dots represent vehicle (DMSO) treatment and filled dots represent VX-809 treatment for CF donors. Open squares indicate non-CF donors. Data are presented as means  $\pm$  standard error of the mean (SEM). Statistical significance is presented as follows: \* =  $P \leq 0.05$ ; \*\* =  $P \leq 0.01$  and \*\*\* =  $P \leq 0.001$ .

CRC<sup>ALI</sup>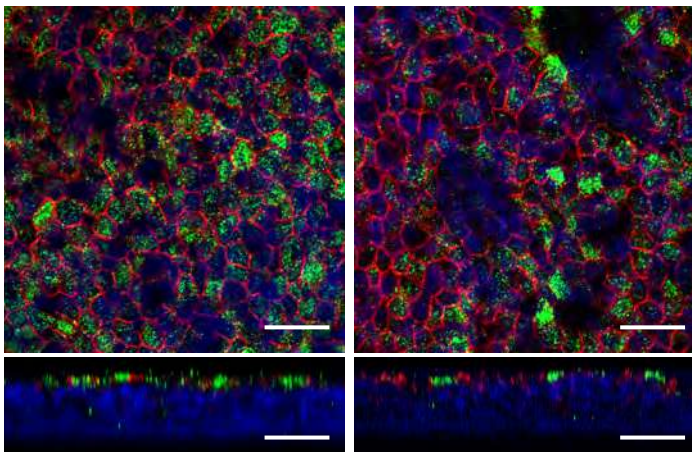

E-cad/CFTR/DAPI

SMAD<sup>iALI</sup>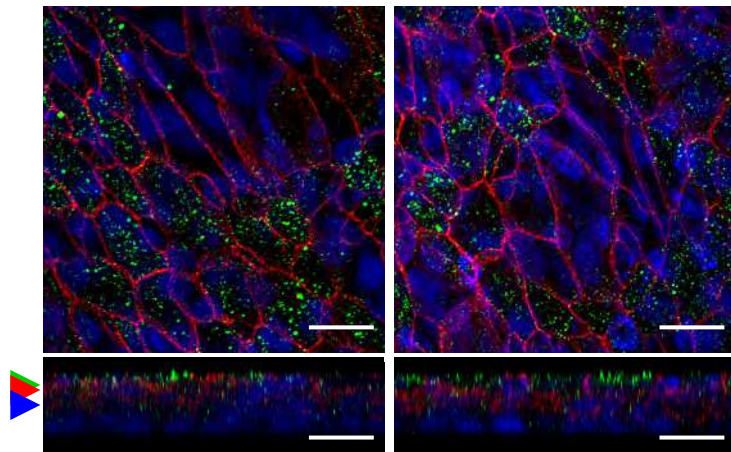

E-cad/CFTR/DAPI

**Fig S4. Apical CFTR expression in CRC<sup>ALI</sup> and SMAD<sup>iALI</sup> from a non-CF donor (Donor 11).** Two different fields of view of CFTR staining are shown for each culture method. XY-images shown in all panels are merged from single channel images acquired at Z-planes indicated by coloured arrows. 63x/1.4 oil immersion objective. Scale bars = 20 $\mu$ m.
